# Supplementary material for: Development and Mining of a Volatile Organic Compound Database
Source: Hindawi journal article supplement (doi:10.1155/2015/139254), 2015-01-01
Supplement: f1 [file 139254.f1.pdf]

**Supplementary Table 1** Microorganisms species name corresponding to the clusters and their pathogenicity.

| Species No | Species Name                                                | Cluster No | Pathogenicity  |
|------------|-------------------------------------------------------------|------------|----------------|
| 1          | <i>Chondromyces crocatus</i>                                | 1          | Non-pathogenic |
| 2          | <i>Nannocystis exedens</i>                                  | 2          | Non-pathogenic |
| 3          | <i>Nannocystis exedens</i> Na eB37                          | 2          | Non-pathogenic |
| 4          | <i>Nannocystis exedens</i> subsp. <i>cinnabarina</i> Na c29 | 2          | Non-pathogenic |
| 5          | <i>Tuber magnatum</i>                                       | 3          | Non-pathogenic |
| 6          | <i>Phoma</i> sp.                                            | 4          | Non-pathogenic |
| 7          | <i>Tuber melanosporum</i>                                   | 5          | Non-pathogenic |
| 8          | <i>Penicillium roqueforti</i> (IBT 16404)                   | 6          | Non-pathogenic |
| 9          | <i>Nannocystis exedens</i> Na e485                          | 6          | Non-pathogenic |
| 10         | <i>Streptomyces citreus</i>                                 | 6          | Non-pathogenic |
| 11         | <i>Acremonium furcatum</i> BAFC 51375                       | 6          | Non-pathogenic |
| 12         | <i>Bacillus</i> strains                                     | 6          | Non-pathogenic |
| 13         | <i>Fistulina hepatica</i> (Schaeffer: Fr.) Fr               | 6          | Non-pathogenic |
| 14         | <i>Octadecabacter</i> sp.                                   | 6          | Non-pathogenic |
| 15         | <i>Octadecabacter</i> sp. ARK10255b                         | 6          | Non-pathogenic |
| 16         | <i>Halomonas venusta</i>                                    | 6          | Non-pathogenic |
| 17         | <i>Planococcus citreus</i>                                  | 6          | Non-pathogenic |
| 18         | <i>Enterobacter agglomerans</i>                             | 6          | Non-pathogenic |
| 19         | <i>Aspergillus versicolor</i>                               | 6          | Non-pathogenic |
| 20         | <i>Streptomyces griseus</i>                                 | 6          | Non-pathogenic |
| 21         | <i>Escherichia</i> sp.                                      | 6          | Non-pathogenic |
| 22         | <i>Bacillus pumilus</i> (BSH-4)                             | 6          | Non-pathogenic |
| 23         | <i>Burkholderia andropogonis</i> LMG 2129                   | 6          | Non-pathogenic |
| 24         | <i>Burkholderia sordidicola</i> LMG 22029                   | 6          | Non-pathogenic |
| 25         | <i>Limnobacter thiooxidans</i> LMG 19593                    | 6          | Non-pathogenic |
| 26         | <i>Stenotrophomonas rhizophilla</i> ep10-p69                | 6          | Non-pathogenic |
| 27         | <i>S.aureus</i> (5)                                         | 6          | Pathogenic     |
| 28         | <i>Agaricus bisporus</i>                                    | 6          | Non-pathogenic |
| 29         | <i>Aspergillus candidus</i>                                 | 6          | Non-pathogenic |
| 30         | <i>Emericella nidulans</i>                                  | 6          | Non-pathogenic |
| 31         | <i>Mycropleptonoides aitchisonii</i> TUFC10099              | 6          | Non-pathogenic |
| 32         | <i>P.aeruginosa</i> (2)                                     | 6          | Pathogenic     |
| 33         | <i>Pseudomonas fluorescens</i> L13-6-12                     | 6          | Non-pathogenic |
| 34         | <i>Pseudomonas</i> sp.                                      | 6          | Non-pathogenic |
| 35         | <i>Pseudomonas trivialis</i> 3Re2-7                         | 6          | Non-pathogenic |
| 36         | <i>Shewanella</i> spp.                                      | 6          | Non-pathogenic |
| 37         | <i>Muscodor fengyangensis</i> (ZJLQ374)                     | 6          | Non-pathogenic |
| 38         | <i>Penicillium expansum</i>                                 | 6          | Non-pathogenic |
| 39         | <i>Muscodor fengyangensis</i> (ZJLQ070)                     | 6          | Non-pathogenic |
| 40         | <i>Muscodor fengyangensis</i> (ZJLQ151)                     | 6          | Non-pathogenic |
| 41         | <i>Muscodor albus</i> I-41. 3s                              | 6          | Non-pathogenic |

|    |                                            |   |                |
|----|--------------------------------------------|---|----------------|
| 42 | Bacillus pumilus (ZB13)                    | 6 | Non-pathogenic |
| 43 | Bacillus subtilis(BL02)                    | 6 | Non-pathogenic |
| 44 | Carnobacterium maltaromaticum              | 6 | Non-pathogenic |
| 45 | Penicillium crustosum                      | 6 | Non-pathogenic |
| 46 | E.coli (3)                                 | 6 | Pathogenic     |
| 47 | Mycobacterium tuberculosis                 | 6 | Pathogenic     |
| 48 | Pseudomonas taetroleus                     | 6 | Non-pathogenic |
| 49 | Penicillium cyclopium                      | 6 | Non-pathogenic |
| 50 | Paecilomyces variotii                      | 6 | Non-pathogenic |
| 51 | Jannaschia helgolandensis strain HEL-26    | 6 | Non-pathogenic |
| 52 | Klebsiella pneumoniae                      | 6 | Pathogenic     |
| 53 | Tuber oligospermum                         | 6 | Non-pathogenic |
| 54 | Thermoactinomyces spp.                     | 6 | Non-pathogenic |
| 55 | Actinobacteria                             | 6 | Non-pathogenic |
| 56 | Oscillatoria chalybea                      | 6 | Non-pathogenic |
| 57 | Oscillatoria sp.                           | 6 | Non-pathogenic |
| 58 | Streptomyces lavendulae                    | 6 | Non-pathogenic |
| 59 | Cytophaga strains                          | 6 | Non-pathogenic |
| 60 | a marine Arctic bacterium                  | 6 | Non-pathogenic |
| 61 | Burkholderia sordidicola LMG 22029         | 6 | Non-pathogenic |
| 62 | Roseobacter clade                          | 6 | Non-pathogenic |
| 63 | Serratia plymuthica 3Re4-18                | 6 | Non-pathogenic |
| 64 | Staphylococcus epidermidis 2P3-18          | 6 | Non-pathogenic |
| 65 | Stenotrophomonas rhizophila P69            | 6 | Non-pathogenic |
| 66 | Arthrobacter globiformis                   | 6 | Non-pathogenic |
| 67 | Streptomyces sp.                           | 6 | Non-pathogenic |
| 68 | Penicillium palitans (commune) (IBT 15899) | 6 | Non-pathogenic |
| 69 | S.aureus (1)                               | 6 | Pathogenic     |
| 70 | Agaricus campestris                        | 6 | Non-pathogenic |
| 71 | Trichoderma aureoviride IMI 91968          | 6 | Non-pathogenic |
| 72 | Aspergillus fumigatus                      | 6 | Non-pathogenic |
| 73 | Sulfitobacter sp. Bio-007                  | 6 | Non-pathogenic |
| 74 | Cenococcum geophilum                       | 6 | Non-pathogenic |
| 75 | Wolinella curva CCUG 13146 (35224)         | 6 | Non-pathogenic |
| 76 | aerobic Gram-negative bacteria             | 6 | Non-pathogenic |
| 77 | K.pneumoniae (2)                           | 6 | Pathogenic     |
| 78 | S.aureus (2)                               | 6 | Pathogenic     |
| 79 | Trichoderma pseudokoningii (T64)           | 6 | Non-pathogenic |
| 80 | Streptomyces antibioticus CBS 659.68       | 6 | Non-pathogenic |
| 81 | psychrotrophic bacteria                    | 6 | Non-pathogenic |
| 82 | Trichoderma viride (T60)                   | 6 | Non-pathogenic |
| 83 | Thermomonospora fusca                      | 6 | Non-pathogenic |
| 84 | Alternaria Alternata                       | 6 | Non-pathogenic |
| 85 | Paenibacillus polymyxa (BMP-11)            | 6 | Non-pathogenic |
| 86 | Puccinia graminis var. tritici             | 6 | Non-pathogenic |

|     |                                               |   |                |
|-----|-----------------------------------------------|---|----------------|
| 87  | Trichoderma sp.                               | 6 | Non-pathogenic |
| 88  | E.coli (2)                                    | 6 | Pathogenic     |
| 89  | Bacillus amyloliquefaciens IN937a             | 6 | Non-pathogenic |
| 90  | Bacillus subtilis GB03                        | 6 | Non-pathogenic |
| 91  | Penicillium digitatum                         | 6 | Non-pathogenic |
| 92  | Bacillus spp.                                 | 6 | Non-pathogenic |
| 93  | Citrobacter freundii                          | 6 | Non-pathogenic |
| 94  | Micrococcus luteus                            | 6 | Non-pathogenic |
| 95  | Staphylococcus aureus                         | 6 | Pathogenic     |
| 96  | Daedalea juniperina                           | 6 | Non-pathogenic |
| 97  | Muscodor fengyangensis (ZJLQ023)              | 6 | Non-pathogenic |
| 98  | Muscodor fengyangensis (ZJLQ024)              | 6 | Non-pathogenic |
| 99  | Oscillatoria perornata                        | 6 | Non-pathogenic |
| 100 | Spirulina platensis                           | 6 | Non-pathogenic |
| 101 | Penicillium clavigerum                        | 6 | Non-pathogenic |
| 102 | Xanthomonas campestris pv campestris          | 6 | Non-pathogenic |
| 103 | Roseovarius spp.                              | 6 | Non-pathogenic |
| 104 | benthic cyanobacteria (Calothrix, Plectonema) | 6 | Non-pathogenic |
| 105 | Cyanobacterial biofilms                       | 6 | Non-pathogenic |
| 106 | Aerobasidium pullulans                        | 6 | Non-pathogenic |
| 107 | E.coli (6)                                    | 6 | Pathogenic     |
| 108 | Dipodascus aggregatus                         | 6 | Non-pathogenic |
| 109 | Pseudomonas solanacearum                      | 6 | Non-pathogenic |
| 110 | Aspergillus clavatus                          | 6 | Non-pathogenic |
| 111 | Blastomyces dermatitidis                      | 6 | Non-pathogenic |
| 112 | Ceratocystis fimbriata                        | 6 | Non-pathogenic |
| 113 | Mucor hiemalis                                | 6 | Non-pathogenic |
| 114 | Tuber borchii 43BO                            | 6 | Non-pathogenic |
| 115 | Tuber borchii ATCC 96540                      | 6 | Non-pathogenic |
| 116 | Tuber melanosporum Bal1                       | 6 | Non-pathogenic |
| 117 | Tuber melanosporum Rey t                      | 6 | Non-pathogenic |
| 118 | Bifidobacterium adolescentis DPC6044          | 6 | Non-pathogenic |
| 119 | Lactobacillus brevis DPC6108                  | 6 | Non-pathogenic |
| 120 | Anabaena                                      | 6 | Non-pathogenic |
| 121 | Fossombronia pusilla                          | 6 | Non-pathogenic |
| 122 | Lyngbya                                       | 6 | Non-pathogenic |
| 123 | Sigmatella aurantiaca                         | 6 | Non-pathogenic |
| 124 | Streptomyces sulfureus                        | 6 | Non-pathogenic |
| 125 | Streptomyces UC5319                           | 6 | Non-pathogenic |
| 126 | Pseudomonas fluorescens AN5                   | 6 | Non-pathogenic |
| 127 | Fomes annosus                                 | 6 | Non-pathogenic |
| 128 | Flavobacteria sp.                             | 6 | Non-pathogenic |
| 129 | Chromobacterium sp.                           | 6 | Non-pathogenic |
| 130 | Clitocybe geotropa                            | 6 | Non-pathogenic |
| 131 | Fomes scutellatus                             | 6 | Non-pathogenic |

|     |                                                                                  |    |                |
|-----|----------------------------------------------------------------------------------|----|----------------|
| 132 | Marasmius oreacles                                                               | 6  | Non-pathogenic |
| 133 | Pholiota aurea                                                                   | 6  | Non-pathogenic |
| 134 | Pantoea agglomerans spp.                                                         | 6  | Non-pathogenic |
| 135 | Pseudonocardia sp.                                                               | 6  | Non-pathogenic |
| 136 | Saccharomonospora sp.                                                            | 6  | Non-pathogenic |
| 137 | Thermomonospora sp.                                                              | 6  | Non-pathogenic |
| 138 | Lactobacillus fermentum                                                          | 6  | Non-pathogenic |
| 139 | Fomes pomaceus                                                                   | 6  | Non-pathogenic |
| 140 | Alphaproteobacteria ( Rhizobium , Sphingomonas , Methylobacterium , Roseovarius) | 6  | Non-pathogenic |
| 141 | Betaproteobacteria (Variovorax , Zoglota)                                        | 6  | Non-pathogenic |
| 142 | Deleya spp.                                                                      | 6  | Non-pathogenic |
| 143 | Photobacterium spp.                                                              | 6  | Non-pathogenic |
| 144 | Plantibacter spp.                                                                | 6  | Non-pathogenic |
| 145 | Pseudoalteromonas spp.                                                           | 6  | Non-pathogenic |
| 146 | Rhizobium spp.                                                                   | 6  | Non-pathogenic |
| 147 | Rhodococcus spp.                                                                 | 6  | Non-pathogenic |
| 148 | Sphingomonas spp.                                                                | 6  | Non-pathogenic |
| 149 | Variovorax spp.                                                                  | 6  | Non-pathogenic |
| 150 | Vibrio spp.                                                                      | 6  | Non-pathogenic |
| 151 | Zoglota spp.                                                                     | 6  | Non-pathogenic |
| 152 | Bacillus popillae                                                                | 6  | Non-pathogenic |
| 153 | Penicillium chrysogenum (IBT 15921)                                              | 6  | Non-pathogenic |
| 154 | Penicillium chrysogenum (IBT 15996)                                              | 6  | Non-pathogenic |
| 155 | Azoarcus evansii                                                                 | 6  | Non-pathogenic |
| 156 | Acinetobacter calcoaceticus                                                      | 6  | Non-pathogenic |
| 157 | Tilletia caries                                                                  | 6  | Non-pathogenic |
| 158 | Tilletia controversa                                                             | 6  | Non-pathogenic |
| 159 | Tilletia foetida                                                                 | 6  | Non-pathogenic |
| 160 | Bacillus thuringensis                                                            | 6  | Non-pathogenic |
| 161 | Chondromyces crocatus Cm c2                                                      | 7  | Non-pathogenic |
| 162 | Chondromyces crocatus Cm c5                                                      | 7  | Non-pathogenic |
| 163 | Myxobacterium spp.                                                               | 8  | Non-pathogenic |
| 164 | Myxococcus xanthus                                                               | 8  | Non-pathogenic |
| 165 | Stigmatella aurantiaca                                                           | 9  | Non-pathogenic |
| 166 | Stigmatella aurantiaca DW4/3-1                                                   | 9  | Non-pathogenic |
| 167 | Stigmatella aurantiaca Sg a15                                                    | 9  | Non-pathogenic |
| 168 | Streptomyces caviscabies                                                         | 10 | Non-pathogenic |
| 169 | Streptomyces sp. GWS-BW-H5.                                                      | 10 | Non-pathogenic |
| 170 | Streptomyces coelicolor                                                          | 11 | Non-pathogenic |
| 171 | Streptomyces albidoflavus                                                        | 11 | Non-pathogenic |
| 172 | Streptomyces albidoflavus AMI 246                                                | 11 | Non-pathogenic |
| 173 | Streptomyces albus                                                               | 11 | Non-pathogenic |
| 174 | Streptomyces albus IFO 13014                                                     | 11 | Non-pathogenic |
| 175 | Streptomyces antibioticus                                                        | 11 | Non-pathogenic |

|     |                                                                |    |                |
|-----|----------------------------------------------------------------|----|----------------|
| 176 | <i>Streptomyces antibioticus</i> ETH 22014                     | 11 | Non-pathogenic |
| 177 | <i>Streptomyces aureofaciens</i> ETH 13387                     | 11 | Non-pathogenic |
| 178 | <i>Streptomyces coelicolor</i> ATCC 21666                      | 11 | Non-pathogenic |
| 179 | <i>Streptomyces coelicolor</i> DSM 40233                       | 11 | Non-pathogenic |
| 180 | <i>Streptomyces diastatochromogenes</i> IFO 13814              | 11 | Non-pathogenic |
| 181 | <i>Streptomyces griseus</i> ATCC 23345                         | 11 | Non-pathogenic |
| 182 | <i>Streptomyces griseus</i> IFO 13849                          | 11 | Non-pathogenic |
| 183 | <i>Streptomyces hirsutus</i> ATCC 19773                        | 11 | Non-pathogenic |
| 184 | <i>Streptomyces hirsutus</i> ETH 1666                          | 11 | Non-pathogenic |
| 185 | <i>Streptomyces hygroscopicus</i> ATCC 27438                   | 11 | Non-pathogenic |
| 186 | <i>Streptomyces murinus</i> DSM 40091                          | 11 | Non-pathogenic |
| 187 | <i>Streptomyces murinus</i> NRRL 8171                          | 11 | Non-pathogenic |
| 188 | <i>Streptomyces olivaceus</i> ETH 6445                         | 11 | Non-pathogenic |
| 189 | <i>Streptomyces olivaceus</i> ETH 7437                         | 11 | Non-pathogenic |
| 190 | <i>Streptomyces rishiriensis</i> AMI 224                       | 11 | Non-pathogenic |
| 191 | <i>Streptomyces</i> spp. AMI 240                               | 11 | Non-pathogenic |
| 192 | <i>Streptomyces</i> spp. AMI 243                               | 11 | Non-pathogenic |
| 193 | <i>Streptomyces thermoviolaceus</i> CBS 111.62                 | 11 | Non-pathogenic |
| 194 | <i>Actinomycetes</i>                                           | 11 | Non-pathogenic |
| 195 | <i>Streptomyces albus</i> subsp. <i>pathocidicus</i> IFO 13812 | 11 | Non-pathogenic |
| 196 | <i>Streptomyces antibioticus</i> CBS 659.68                    | 11 | Non-pathogenic |
| 197 | <i>Streptomyces aureofaciens</i> ETH 28832                     | 11 | Non-pathogenic |
| 198 | <i>Streptomyces diastatochromogenes</i> ETH 18822              | 11 | Non-pathogenic |
| 199 | <i>Streptomyces hygroscopicus</i> IFO 13255                    | 11 | Non-pathogenic |
| 200 | <i>Streptomyces thermoviolaceus</i> IFO 12382                  | 11 | Non-pathogenic |
| 201 | <i>Streptomyces</i> spp.                                       | 12 | Non-pathogenic |
| 202 | <i>Bacillus</i>                                                | 13 | Non-pathogenic |
| 203 | <i>Tuber borchii</i>                                           | 14 | Non-pathogenic |
| 204 | <i>Tuber indicum</i>                                           | 15 | Non-pathogenic |
| 205 | marine <i>Streptomyces</i> (isolate B6007)                     | 16 | Non-pathogenic |
| 206 | <i>Prevotella buccae</i> ATCC 33574                            | 16 | Non-pathogenic |
| 207 | <i>Prevotella buccae</i> ES12-B                                | 16 | Non-pathogenic |
| 208 | <i>Prevotella buccae</i> ES17-1                                | 16 | Non-pathogenic |
| 209 | <i>Prevotella buccae</i> ES9-1                                 | 16 | Non-pathogenic |
| 210 | <i>Prevotella disiens</i> DSM 20516                            | 16 | Non-pathogenic |
| 211 | <i>Prevotella heparinolyticus</i> ATCC 35895                   | 16 | Non-pathogenic |
| 212 | <i>Prevotella oris</i> ATCC 33573                              | 16 | Non-pathogenic |
| 213 | <i>Prevotella oris</i> ES14B-3A                                | 16 | Non-pathogenic |
| 214 | <i>Prevotella oris</i> ES9-3                                   | 16 | Non-pathogenic |
| 215 | <i>Prevotella oris</i> RPG                                     | 16 | Non-pathogenic |
| 216 | <i>Prevotella veroralis</i> ATCC 33779                         | 16 | Non-pathogenic |
| 217 | <i>Porphyromonas endodontalis</i> HG 181 (H 11a-e)             | 16 | Non-pathogenic |
| 218 | <i>Porphyromonas endodontalis</i> HG 182 (BN 11a-f)            | 16 | Non-pathogenic |
| 219 | <i>Porphyromonas endodontalis</i> HG 370 (ATCC 35406)          | 16 | Non-pathogenic |
| 220 | <i>Porphyromonas endodontalis</i> HG 412                       | 16 | Non-pathogenic |

|     |                                             |    |                |
|-----|---------------------------------------------|----|----------------|
| 221 | <i>Prevotella oralis</i> ES4-B              | 16 | Non-pathogenic |
| 222 | <i>Bacteroides fragilis</i>                 | 16 | Non-pathogenic |
| 223 | <i>Bacteroides fragilis</i> ATCC 25285      | 16 | Non-pathogenic |
| 224 | <i>Prevotella oralis</i> ES14B-3A           | 16 | Non-pathogenic |
| 225 | <i>Prevotella oralis</i> ES15-2             | 16 | Non-pathogenic |
| 226 | ARK10063                                    | 17 | Non-pathogenic |
| 227 | <i>Bjerkandera adusta</i>                   | 17 | Non-pathogenic |
| 228 | <i>Bjerkandera adusta</i> CBS 595.78        | 17 | Non-pathogenic |
| 229 | <i>Armillaria mellea</i>                    | 18 | Non-pathogenic |
| 230 | <i>Pholiota squarrosa</i>                   | 18 | Non-pathogenic |
| 231 | <i>Stropharia rugosoannulata</i>            | 18 | Non-pathogenic |
| 232 | <i>Verticillium longisporum</i>             | 19 | Non-pathogenic |
| 233 | <i>Candida tropicalis</i>                   | 19 | Non-pathogenic |
| 234 | <i>Salmonella enterica</i>                  | 19 | Non-pathogenic |
| 235 | <i>Shigella flexneri</i>                    | 19 | Non-pathogenic |
| 236 | <i>Tuber panniferum</i>                     | 19 | Non-pathogenic |
| 237 | <i>Tuber excavatum</i>                      | 19 | Non-pathogenic |
| 238 | <i>Penicillium aurantiogriseum</i>          | 19 | Non-pathogenic |
| 239 | <i>Ascocoryne sarcoides</i> NRRL 50072      | 19 | Non-pathogenic |
| 240 | <i>Aspergillus ornatus</i>                  | 19 | Non-pathogenic |
| 241 | <i>Neurospora sitophila</i> ATCC 46892      | 19 | Non-pathogenic |
| 242 | <i>Neurospora</i> sp.                       | 19 | Non-pathogenic |
| 243 | <i>Penicillium chrysogenum</i>              | 19 | Non-pathogenic |
| 244 | <i>penicillium paneum</i> (Conidia)         | 19 | Non-pathogenic |
| 245 | <i>Tuber uncinatum</i>                      | 19 | Non-pathogenic |
| 246 | <i>Ceratocystis</i> sp.                     | 19 | Non-pathogenic |
| 247 | <i>Thielaviopsis basicola</i>               | 19 | Non-pathogenic |
| 248 | <i>Mycobacterium bovis</i>                  | 19 | Non-pathogenic |
| 249 | <i>Muscodor albus</i> CZ-620                | 19 | Non-pathogenic |
| 250 | <i>Muscodor crispans</i>                    | 19 | Non-pathogenic |
| 251 | <i>Boletus variegatus</i>                   | 19 | Non-pathogenic |
| 252 | <i>Fomes</i> sp.                            | 19 | Non-pathogenic |
| 253 | <i>Dinoroseobacter shibae</i>               | 20 | Non-pathogenic |
| 254 | <i>Dinoroseobacter shibae</i> strain DFL-27 | 20 | Non-pathogenic |
| 255 | <i>Loktanella</i> sp.                       | 20 | Non-pathogenic |
| 256 | <i>Loktanella</i> sp. Bio-204               | 20 | Non-pathogenic |
| 257 | <i>Carnobacterium divergens</i> 9P          | 21 | Non-pathogenic |
| 258 | <i>Dinoroseobacter</i> sp.                  | 22 | Non-pathogenic |
| 259 | <i>Stigmatella</i> sp.                      | 22 | Non-pathogenic |
| 260 | <i>Calothrix</i>                            | 23 | Non-pathogenic |
| 261 | <i>Phormidium</i> sp.                       | 23 | Non-pathogenic |
| 262 | <i>Plectonema</i>                           | 23 | Non-pathogenic |
| 263 | <i>Calothrix parietina</i>                  | 23 | Non-pathogenic |
| 264 | <i>Plectonema notatum</i>                   | 23 | Non-pathogenic |
| 265 | <i>Plectonema</i> sp.                       | 23 | Non-pathogenic |

|     |                                     |    |                |
|-----|-------------------------------------|----|----------------|
| 266 | Tolypothrix                         | 23 | Non-pathogenic |
| 267 | Tolypothrix distorta                | 23 | Non-pathogenic |
| 268 | Calothrix sp.                       | 23 | Non-pathogenic |
| 269 | Burkholderia ambifaria LMG 19467    | 24 | Non-pathogenic |
| 270 | Burkholderia ambifaria LMG 17828    | 24 | Non-pathogenic |
| 271 | Burkholderia ambifaria LMG 19182    | 24 | Non-pathogenic |
| 272 | Alcaligenes                         | 25 | Non-pathogenic |
| 273 | Alcaligenes faecalis                | 25 | Non-pathogenic |
| 274 | Arthrobacter nitroguajacoli         | 25 | Non-pathogenic |
| 275 | Lysobacter gummosus                 | 25 | Non-pathogenic |
| 276 | Sporosarcina ginsengisoli           | 25 | Non-pathogenic |
| 277 | Stenotrophomonas maltophilia        | 26 | Non-pathogenic |
| 278 | Serratia marcescens                 | 26 | Non-pathogenic |
| 279 | Bacillus simplex                    | 26 | Non-pathogenic |
| 280 | Bacillus subtilis                   | 26 | Non-pathogenic |
| 281 | Bacillus weihenstephanensis         | 26 | Non-pathogenic |
| 282 | Microbacterium oxydans              | 26 | Non-pathogenic |
| 283 | Streptomyces lateritius             | 26 | Non-pathogenic |
| 284 | Escherichia coli                    | 27 | Pathogenic     |
| 285 | Burkholderia anthina LMG 20980      | 27 | Non-pathogenic |
| 286 | Burkholderia gladioli LMG 2216      | 27 | Non-pathogenic |
| 287 | Burkholderia glumae LMG 2196        | 27 | Non-pathogenic |
| 288 | Burkholderia caledonica LMG 19076   | 27 | Non-pathogenic |
| 289 | Burkholderia caribensis LMG 18531   | 27 | Non-pathogenic |
| 290 | Burkholderia caryophylli LMG 2155   | 27 | Non-pathogenic |
| 291 | Burkholderia fungorum LMG 16225     | 27 | Non-pathogenic |
| 292 | Burkholderia glathei LMG 14190      | 27 | Non-pathogenic |
| 293 | Burkholderia lata LMG 22485         | 27 | Non-pathogenic |
| 294 | Serratia plymuthica IC14            | 27 | Non-pathogenic |
| 295 | Burkholderia graminis LMG 18924     | 27 | Non-pathogenic |
| 296 | Cellulomonas uda                    | 27 | Non-pathogenic |
| 297 | Paenibacillus polymyxa              | 28 | Non-pathogenic |
| 298 | Paenibacillus polymyxa E681         | 28 | Non-pathogenic |
| 299 | Trichoderma viride                  | 29 | Non-pathogenic |
| 300 | Tuber aestivum                      | 30 | Non-pathogenic |
| 301 | Tuber brumale                       | 31 | Non-pathogenic |
| 302 | Tuber mesentericum                  | 31 | Non-pathogenic |
| 303 | Tuber rufum                         | 31 | Non-pathogenic |
| 304 | Tuber simonea                       | 31 | Non-pathogenic |
| 305 | Pseudomonas fragi 25P               | 32 | Non-pathogenic |
| 306 | Burkholderia lata LMG 6993          | 33 | Non-pathogenic |
| 307 | Burkholderia phenazinium LMG 2247   | 33 | Non-pathogenic |
| 308 | Burkholderia phytofirmans LMG 22487 | 33 | Non-pathogenic |
| 309 | Burkholderia pyrrocinia LMG 21822   | 33 | Non-pathogenic |
| 310 | Burkholderia terricola LMG 20594    | 33 | Non-pathogenic |

|     |                                              |    |                |
|-----|----------------------------------------------|----|----------------|
| 311 | <i>Chromobacterium violaceum</i>             | 33 | Non-pathogenic |
| 312 | <i>Chromobacterium violaceum</i> CV0         | 33 | Non-pathogenic |
| 313 | <i>Pseudomonas putida</i>                    | 33 | Non-pathogenic |
| 314 | <i>Pseudomonas putida</i> ISO                | 33 | Non-pathogenic |
| 315 | <i>Serratia marcescens</i> MG1               | 33 | Non-pathogenic |
| 316 | <i>Serratia plymuthica</i> HRO-C48           | 33 | Non-pathogenic |
| 317 | <i>Burkholderia sacchari</i> LMG 19450       | 33 | Non-pathogenic |
| 318 | <i>Burkholderia thailandensis</i> LMG 20219  | 33 | Non-pathogenic |
| 319 | <i>Pseudomonas fluorescens</i> WCS 417r      | 33 | Non-pathogenic |
| 320 | <i>Serratia entomophila</i> A1MO2            | 33 | Non-pathogenic |
| 321 | <i>Serratia proteamaculans</i> B5a           | 33 | Non-pathogenic |
| 322 | <i>Burkholderia tropica</i> LMG 22274        | 34 | Non-pathogenic |
| 323 | <i>Burkholderia cepacia</i> LMG 1222 358     | 34 | Non-pathogenic |
| 324 | <i>Burkholderia hospita</i> LMG 20598        | 34 | Non-pathogenic |
| 325 | <i>Burkholderia kururiensis</i> LMG 19447    | 34 | Non-pathogenic |
| 326 | <i>Burkholderia phenoliruptrix</i> LMG 22037 | 34 | Non-pathogenic |
| 327 | <i>Burkholderia xenovorans</i> LMG 21463     | 34 | Non-pathogenic |
| 328 | <i>Serratia</i> sp.                          | 34 | Non-pathogenic |
| 329 | <i>Pandora</i> norimbergensis LMG 18379      | 34 | Non-pathogenic |
| 330 | <i>E.coli</i> (1)                            | 35 | Pathogenic     |
| 331 | <i>E.coli</i> (4)                            | 35 | Pathogenic     |
| 332 | <i>K.pneumoniae</i> (1)                      | 35 | Pathogenic     |
| 333 | <i>K.pneumoniae</i> (3)                      | 35 | Pathogenic     |
| 334 | <i>E.coli</i> (7)                            | 35 | Pathogenic     |
| 335 | <i>E.coli</i> (8)                            | 35 | Pathogenic     |
| 336 | <i>E.coli</i> (9)                            | 35 | Pathogenic     |
| 337 | <i>E.coli</i> (10)                           | 35 | Pathogenic     |
| 338 | <i>E.coli</i> (11)                           | 35 | Pathogenic     |
| 339 | <i>E.coli</i> (12)                           | 35 | Pathogenic     |
| 340 | <i>E.coli</i> (13)                           | 35 | Pathogenic     |
| 341 | <i>E.coli</i> (14)                           | 35 | Pathogenic     |
| 342 | <i>E.coli</i> (15)                           | 35 | Pathogenic     |
| 343 | <i>E.coli</i> (16)                           | 35 | Pathogenic     |
| 344 | <i>E.coli</i> (17)                           | 35 | Pathogenic     |
| 345 | <i>E.coli</i> (18)                           | 35 | Pathogenic     |
| 346 | <i>E.coli</i> (19)                           | 35 | Pathogenic     |
| 347 | <i>E.coli</i> (20)                           | 35 | Pathogenic     |
| 348 | <i>E.coli</i> (21)                           | 35 | Pathogenic     |
| 349 | <i>E.coli</i> (22)                           | 35 | Pathogenic     |
| 350 | <i>E.coli</i> (23)                           | 35 | Pathogenic     |
| 351 | <i>E.coli</i> (24)                           | 35 | Pathogenic     |
| 352 | <i>K.pneumoniae</i> (4)                      | 35 | Pathogenic     |
| 353 | <i>K.pneumoniae</i> (5)                      | 35 | Pathogenic     |
| 354 | <i>K.pneumoniae</i> (6)                      | 35 | Pathogenic     |
| 355 | <i>K.pneumoniae</i> (7)                      | 35 | Pathogenic     |



|     |                                            |    |                |
|-----|--------------------------------------------|----|----------------|
| 356 | K.pneumoniae (8)                           | 35 | Pathogenic     |
| 357 | K.pneumoniae (9)                           | 35 | Pathogenic     |
| 358 | K.pneumoniae (15)                          | 35 | Pathogenic     |
| 359 | K.pneumoniae (16)                          | 35 | Pathogenic     |
| 360 | K.pneumoniae (17)                          | 35 | Pathogenic     |
| 361 | K.pneumoniae (18)                          | 35 | Pathogenic     |
| 362 | P.aeruginosa (1)                           | 35 | Pathogenic     |
| 363 | K.pneumoniae (13)                          | 35 | Pathogenic     |
| 364 | K.pneumoniae (14)                          | 35 | Pathogenic     |
| 365 | Pseudomonas aurantiaca                     | 36 | Non-pathogenic |
| 366 | Pseudomonas chlororaphis                   | 36 | Non-pathogenic |
| 367 | Pseudomonas corrugate                      | 36 | Non-pathogenic |
| 368 | Pseudomonas fluorescens                    | 36 | Non-pathogenic |
| 369 | Cupriavidus necator LMG 1199               | 37 | Non-pathogenic |
| 370 | Klebsiella sp.                             | 37 | Non-pathogenic |
| 371 | Pseudomonas aeruginosa PUPa3               | 37 | Non-pathogenic |
| 372 | Citrobacter sp.                            | 37 | Non-pathogenic |
| 373 | Enterobacter spp.                          | 37 | Non-pathogenic |
| 374 | Lactobacillus brevis                       | 37 | Non-pathogenic |
| 375 | Lactobacillus hilgardii                    | 37 | Non-pathogenic |
| 376 | Oenococcus oeni                            | 37 | Non-pathogenic |
| 377 | Lactobacillus lactis                       | 37 | Non-pathogenic |
| 378 | Alpha proteobacteria                       | 37 | Non-pathogenic |
| 379 | Gamma proteobacteria                       | 37 | Non-pathogenic |
| 380 | Klebsiella oxytoca                         | 37 | Non-pathogenic |
| 381 | Lactobacillus sp.                          | 37 | Non-pathogenic |
| 382 | Lactococcus sp.                            | 37 | Non-pathogenic |
| 383 | Schizophyllum commune                      | 37 | Non-pathogenic |
| 384 | Alphaproteobacteria (e.g. Roseobacter sp.) | 37 | Non-pathogenic |
| 385 | Betaproteobacteria (Alcaligenes faecalis)  | 37 | Non-pathogenic |
| 386 | Desulfovibrio acrylicus                    | 37 | Non-pathogenic |
| 387 | Parasporobacterium paucivorans             | 37 | Non-pathogenic |
| 388 | Treponema denticola                        | 37 | Non-pathogenic |
| 389 | Brevibacterium linens                      | 37 | Non-pathogenic |
| 390 | Aspergillus flavus                         | 38 | Non-pathogenic |
| 391 | Aspergillus flavus NRRL 18543              | 38 | Non-pathogenic |
| 392 | Aspergillus flavus NRRL 25347              | 38 | Non-pathogenic |
| 393 | Aspergillus niger                          | 38 | Non-pathogenic |
| 394 | Aspergillus niger NRRL 326                 | 38 | Non-pathogenic |
| 395 | Aspergillus parasiticus NRRL 5862          | 38 | Non-pathogenic |
| 396 | Penicillium glabrum NRRL 766               | 38 | Non-pathogenic |
| 397 | Rhizopus stolonifer                        | 38 | Non-pathogenic |
| 398 | Rhizopus stolonifer NRRL 54667             | 38 | Non-pathogenic |
| 399 | Serratia proteamaculans 42M                | 39 | Non-pathogenic |
| 400 | E. cloacae                                 | 40 | Pathogenic     |

|     |                                                   |    |                |
|-----|---------------------------------------------------|----|----------------|
| 401 | S.aureus (3)                                      | 40 | Pathogenic     |
| 402 | K.pneumoniae (11)                                 | 40 | Pathogenic     |
| 403 | S.aureus (6)                                      | 40 | Pathogenic     |
| 404 | S.aureus (8)                                      | 40 | Pathogenic     |
| 405 | S.aureus (10)                                     | 40 | Pathogenic     |
| 406 | S.aureus (11)                                     | 40 | Pathogenic     |
| 407 | S.aureus (13)                                     | 40 | Pathogenic     |
| 408 | S.aureus (14)                                     | 40 | Pathogenic     |
| 409 | S.aureus (17)                                     | 40 | Pathogenic     |
| 410 | S.aureus (20)                                     | 40 | Pathogenic     |
| 411 | K.pneumoniae (10)                                 | 40 | Pathogenic     |
| 412 | K.pneumoniae (12)                                 | 40 | Pathogenic     |
| 413 | K.pneumoniae (19)                                 | 40 | Pathogenic     |
| 414 | K.pneumoniae (20)                                 | 40 | Pathogenic     |
| 415 | S.aureus (7)                                      | 40 | Pathogenic     |
| 416 | S.aureus (9)                                      | 40 | Pathogenic     |
| 417 | S.aureus (12)                                     | 40 | Pathogenic     |
| 418 | S.aureus (15)                                     | 40 | Pathogenic     |
| 419 | S.aureus (16)                                     | 40 | Pathogenic     |
| 420 | S.aureus (18)                                     | 40 | Pathogenic     |
| 421 | S.aureus (19)                                     | 40 | Pathogenic     |
| 422 | S.aureus (21)                                     | 40 | Pathogenic     |
| 423 | S.aureus (22)                                     | 40 | Pathogenic     |
| 424 | biofilms A (Rivularia sp./C. parietina community) | 41 | Non-pathogenic |
| 425 | C. parietina                                      | 41 | Non-pathogenic |
| 426 | Cyanobacteria                                     | 41 | Non-pathogenic |
| 427 | Rivularia sp.                                     | 41 | Non-pathogenic |
| 428 | Laccaria bicolor                                  | 42 | Non-pathogenic |
| 429 | Paxillus involutus MAJ                            | 42 | Non-pathogenic |
| 430 | Paxillus involutus NAU                            | 42 | Non-pathogenic |
| 431 | Penicillium sp.                                   | 43 | Non-pathogenic |
| 432 | Desulfovibrio gigas                               | 43 | Non-pathogenic |
| 433 | Methanobacterium formicicum                       | 43 | Non-pathogenic |
| 434 | Methanobacterium thermoautotrophicum              | 43 | Non-pathogenic |
| 435 | Methanosarcina barkeri                            | 43 | Non-pathogenic |
| 436 | Aeromonas veronii                                 | 43 | Non-pathogenic |
| 437 | Geobacillus stearothermophilus                    | 43 | Non-pathogenic |
| 438 | Clostridium collagenovorans                       | 43 | Non-pathogenic |
| 439 | Desulfovibrio vulgaris                            | 43 | Non-pathogenic |
| 440 | Enterobacter cloacae                              | 43 | Non-pathogenic |
| 441 | Rhodobacter spaeroides                            | 43 | Non-pathogenic |
| 442 | Rhodocyclus tenuis                                | 43 | Non-pathogenic |
| 443 | Rhodospirillum rubrum                             | 43 | Non-pathogenic |
| 444 | Aspergillus sp.                                   | 43 | Non-pathogenic |
| 445 | Candida humicola                                  | 43 | Non-pathogenic |

|     |                                                                                  |    |                |
|-----|----------------------------------------------------------------------------------|----|----------------|
| 446 | Scopulariopsis brevicaulis                                                       | 43 | Non-pathogenic |
| 447 | Methanobacterium sp.                                                             | 43 | Non-pathogenic |
| 448 | Bacterium from CFB group                                                         | 43 | Non-pathogenic |
| 449 | Saccharomyces cerevisiae Y1001                                                   | 44 | Non-pathogenic |
| 450 | Serratia spp. B2675                                                              | 44 | Non-pathogenic |
| 451 | Serratia spp. B675                                                               | 44 | Non-pathogenic |
| 452 | Saccharomyces cerevisiae                                                         | 44 | Non-pathogenic |
| 453 | Xanthomonas campestris pv. vesicatoria 85-10                                     | 45 | Non-pathogenic |
| 454 | Sulfitobacter pontiacus                                                          | 46 | Non-pathogenic |
| 455 | Sulfitobacter pontiacus BIO-007                                                  | 46 | Non-pathogenic |
| 456 | Sulfitobacter sp.                                                                | 46 | Non-pathogenic |
| 457 | Loktanella hongkongensis strain Bio-204                                          | 46 | Non-pathogenic |
| 458 | Sulfitobacter dubius BIO-205                                                     | 46 | Non-pathogenic |
| 459 | bacterial strains from the North Sea, the Arctic Ocean, or of terrestrial origin | 46 | Non-pathogenic |
| 460 | Oceanibulbus indolifex HEL-45                                                    | 46 | Non-pathogenic |
| 461 | Roseobacter gallaeciensis strain PIC-68                                          | 46 | Non-pathogenic |
| 462 | Stappia marina strain DFL-11                                                     | 46 | Non-pathogenic |
| 463 | Sulfitobacter sp. PIC-70                                                         | 46 | Non-pathogenic |
| 464 | E.coli (5)                                                                       | 47 | Pathogenic     |
| 465 | S.aureus (4)                                                                     | 47 | Pathogenic     |
| 466 | Staphylococcus sp.                                                               | 48 | Pathogenic     |
| 467 | Staphylococcus xylosus                                                           | 48 | Pathogenic     |
| 468 | Clostridium sp.                                                                  | 48 | Pathogenic     |
| 469 | Bacteroides distasonis                                                           | 48 | Non-pathogenic |
| 470 | Bacteroides ovatus                                                               | 48 | Non-pathogenic |
| 471 | Bacteroides thetaiotamicron                                                      | 48 | Non-pathogenic |
| 472 | Bacteroides vulgatus                                                             | 48 | Non-pathogenic |
| 473 | Capnocytophaga ochracea ATCC 33596                                               | 48 | Non-pathogenic |
| 474 | Clostridium bifermentans                                                         | 48 | Non-pathogenic |
| 475 | Clostridium sporogenes                                                           | 48 | Non-pathogenic |
| 476 | Fusobacterium nucleatum                                                          | 48 | Non-pathogenic |
| 477 | Porphyromonas gingivalis                                                         | 48 | Non-pathogenic |
| 478 | Porphyromonas gingivalis FDC381                                                  | 48 | Non-pathogenic |
| 479 | Porphyromonas gingivalis W83                                                     | 48 | Pathogenic     |
| 480 | Prevotella intermedia ATCC 25261                                                 | 48 | Non-pathogenic |
| 481 | Prevotella loescheii                                                             | 48 | Non-pathogenic |
| 482 | Prevotella loescheii ATCC 15930                                                  | 48 | Non-pathogenic |
| 483 | Veillonella spp.                                                                 | 48 | Non-pathogenic |
| 484 | Actinobacillus actinomycetemcomitans Y4                                          | 48 | Non-pathogenic |
| 485 | Bacteroides bivius                                                               | 48 | Non-pathogenic |
| 486 | Clostridium butyricum                                                            | 48 | Non-pathogenic |
| 487 | Clostridium cadaverum                                                            | 48 | Non-pathogenic |
| 488 | Clostridium fallax                                                               | 48 | Non-pathogenic |
| 489 | Clostridium histolyticum                                                         | 48 | Non-pathogenic |
| 490 | Clostridium tertium                                                              | 48 | Non-pathogenic |

|     |                                                                           |    |                |
|-----|---------------------------------------------------------------------------|----|----------------|
| 491 | <i>Lactobacillus casei</i> NCIB 8010                                      | 49 | Non-pathogenic |
| 492 | <i>Lactobacillus plantarum</i>                                            | 49 | Non-pathogenic |
| 493 | <i>Lactobacillus plantarum</i> NCIB 6376                                  | 49 | Non-pathogenic |
| 494 | <i>Lactococcus lactis</i>                                                 | 49 | Non-pathogenic |
| 495 | <i>Lactococcus lactis</i> DSM 20202                                       | 49 | Non-pathogenic |
| 496 | <i>Leuconostoc cremoris</i> DSM 20346                                     | 49 | Non-pathogenic |
| 497 | <i>Leuconostoc dextranicum</i> DSM 20484                                  | 49 | Non-pathogenic |
| 498 | <i>Leuconostoc mesenteroides</i> DSM 20343                                | 49 | Non-pathogenic |
| 499 | <i>Leuconostoc oenos</i>                                                  | 49 | Non-pathogenic |
| 500 | <i>Leuconostoc oenos</i> B66                                              | 49 | Non-pathogenic |
| 501 | <i>Leuconostoc oenos</i> 19                                               | 49 | Non-pathogenic |
| 502 | <i>Leuconostoc oenos</i> 30                                               | 49 | Non-pathogenic |
| 503 | <i>Leuconostoc oenos</i> 36                                               | 49 | Non-pathogenic |
| 504 | <i>Leuconostoc oenos</i> 37D                                              | 49 | Non-pathogenic |
| 505 | <i>Leuconostoc oenos</i> 7B                                               | 49 | Non-pathogenic |
| 506 | <i>Leuconostoc oenos</i> DSM 20252                                        | 49 | Non-pathogenic |
| 507 | <i>Leuconostoc oenos</i> DSM 20255                                        | 49 | Non-pathogenic |
| 508 | <i>Leuconostoc oenos</i> DSM 20257                                        | 49 | Non-pathogenic |
| 509 | <i>Leuconostoc oenos</i> Lc5x                                             | 49 | Non-pathogenic |
| 510 | <i>Leuconostoc paramesenteroides</i> DSM 20288                            | 49 | Non-pathogenic |
| 511 | <i>Pediococcus damnosus</i> DSM 20331                                     | 49 | Non-pathogenic |
| 512 | <i>Bacteroides gracilis</i> CCUG 13143 (ATCC 33236)                       | 50 | Non-pathogenic |
| 513 | <i>Bacteroides ureolyticus</i> CCUG 7319 (ATCC 33387)                     | 50 | Non-pathogenic |
| 514 | <i>Campylobacter fetus</i> subsp. <i>venerealis</i> CCUG 538 (ATCC 19438) | 50 | Non-pathogenic |
| 515 | <i>Wolinella recta</i> FDC 371 (ATCC 33238)                               | 50 | Non-pathogenic |
| 516 | <i>Wolinella succinogenes</i> CCUG 12550 (ATCC 29543)                     | 50 | Non-pathogenic |
| 517 | <i>Wolinella curva</i> CCUG 13146 (ATCC 35224)                            | 50 | Non-pathogenic |

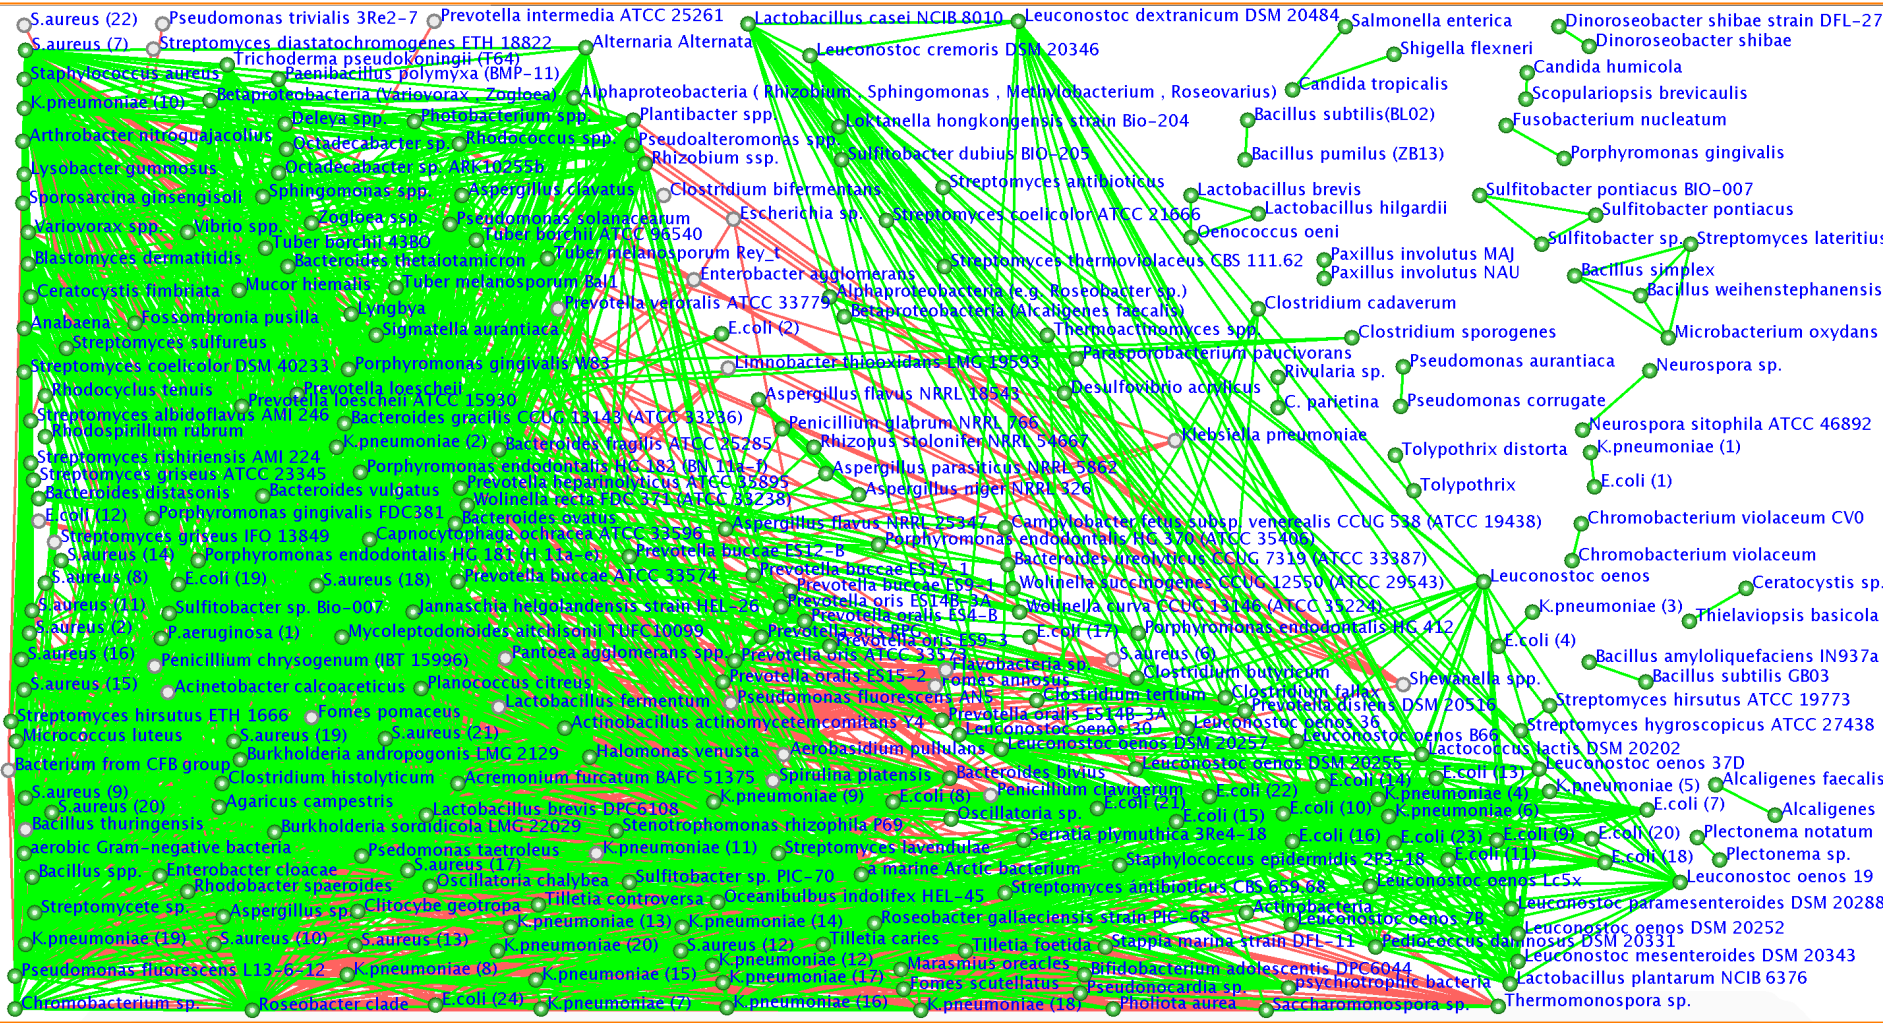

Supplementary Figure 1

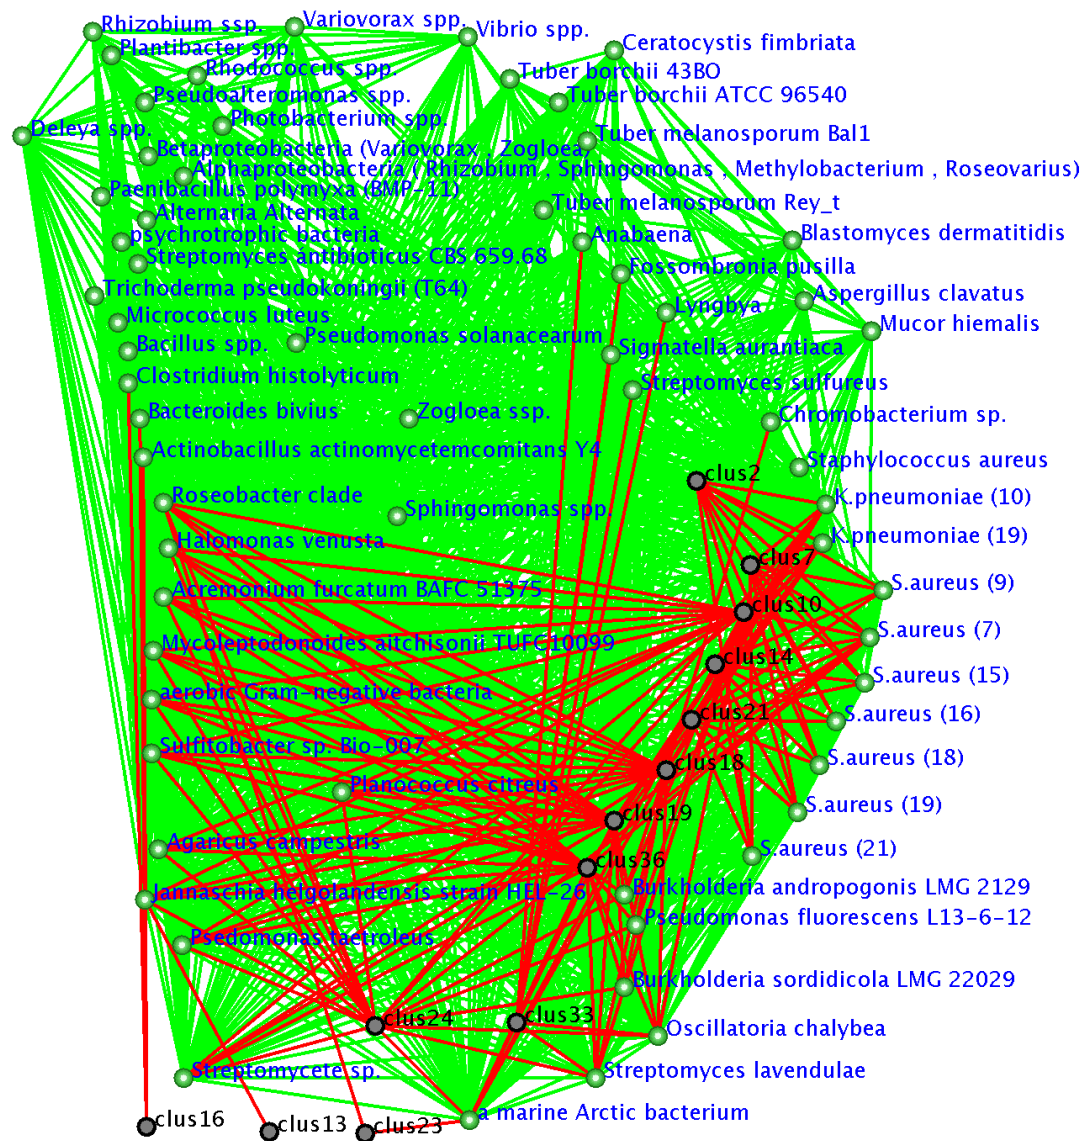

(A)

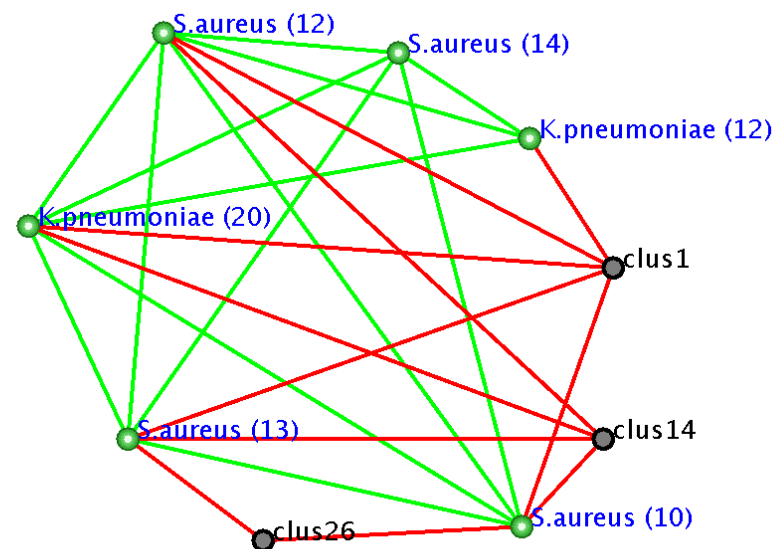

(B)

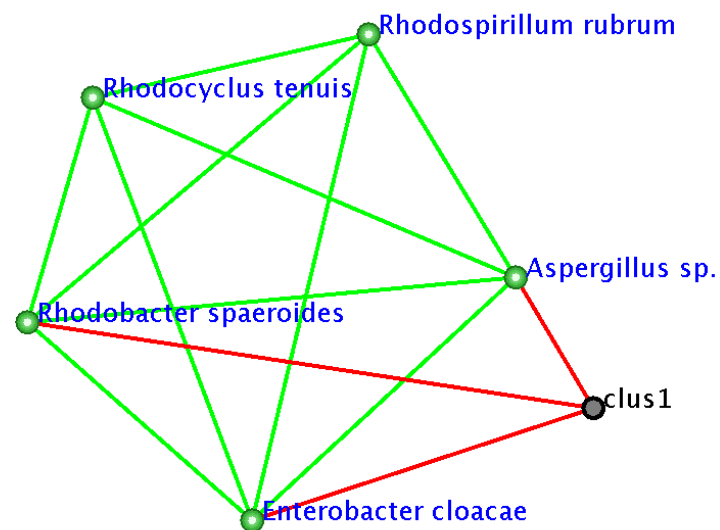

(C)

# Cluster 1 (55 VOCs)

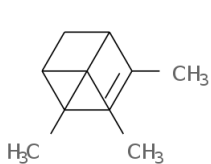

C00000805  
alpha-Pinene  
PubChem CID: 6654  
C10H16

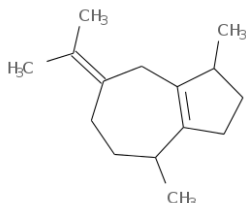

C00020376  
beta-Guaiene  
PubChem CID: 6949  
C15H24

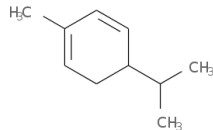

C00003051  
alpha-Phellandrene  
PubChem CID: 7460  
C10H16

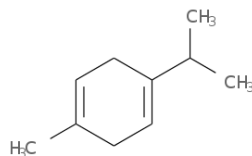

gamma-Terpinen  
PubChem CID: 7461  
C10H16

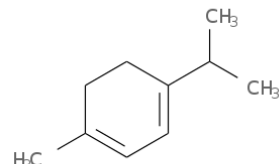

C00003060  
alpha-Terpinene  
PubChem CID: 7462  
C10H16

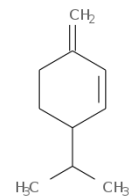

C00010872  
abeta-Phellandrene  
PubChem CID: 11142  
C10H16

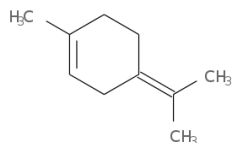

Terpinolene  
PubChem CID: 11463  
C10H16

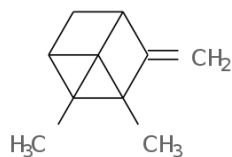

C00000816  
beta-Pinene  
PubChem CID: 14896  
C10H16

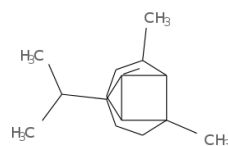

C00003118  
Copaene  
PubChem CID: 19725  
C15H24

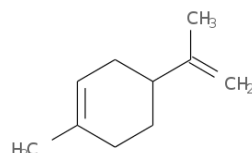

C00010868  
d-Limonene  
PubChem CID: 22311  
C10H16

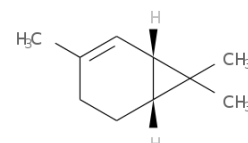

(+)-2-Carene  
PubChem CID: 78249  
C10H16

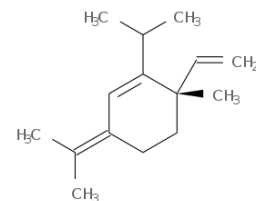

alpha-Elementene  
PubChem CID: 80048  
C15H24

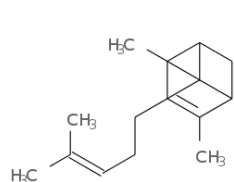

(E)-alpha-Bergamotene  
PubChem CID: 86608  
C15H24

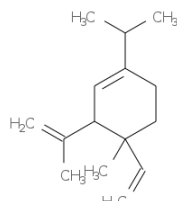

C00012011  
delta-Elementene  
PubChem CID: 89316  
C15H24

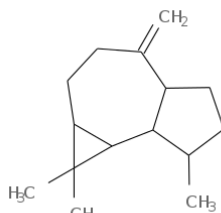

C00021230  
Aromadendrene  
PubChem CID: 91354  
C15H24

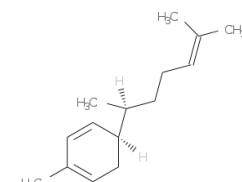

C00003204  
alpha-Zingiberene  
PubChem CID: 92776  
C15H24

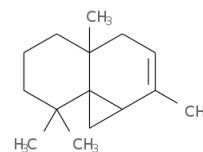

C00003194  
Thujopsene  
PubChem CID: 97829  
C15H24

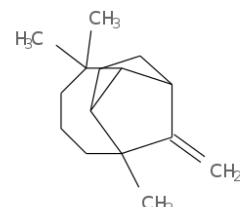

C00003162  
Longifolene  
PubChem CID: 289151  
C15H24

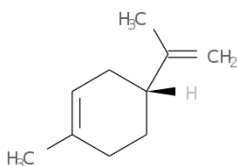

(+)-Limonene  
PubChem CID: 440917  
C10H16

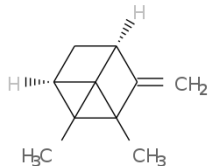

C00000806  
(-)-beta-Pinene  
PubChem CID: 440967  
C10H16

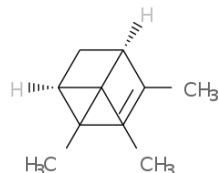

1-alpha-Pinene  
PubChem CID: 440968  
C10H16

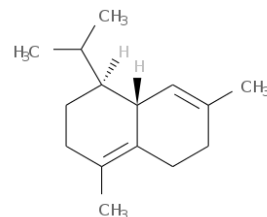

C00007636  
delta-Cadinene  
PubChem CID: 441005  
C15H24

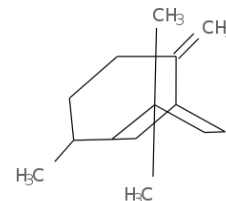

C00021999  
Seychellene  
PubChem CID: 519743  
C15H24

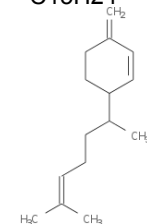

Sesquiphellandrene  
PubChem CID: 519764  
C15H24

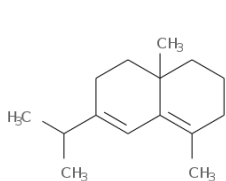

**C00007634**  
**delta-Selinene**  
PubChem CID: 520383  
C15H24

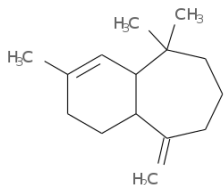

**C00021309**  
**alpha-Himachalene**  
PubChem CID: 520909  
C15H24

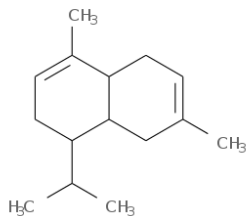

**Cadinene**  
PubChem CID: 521380  
C15H24

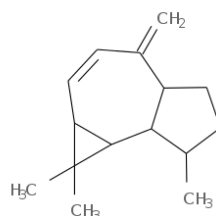

**Dehydroaromadendrene**  
PubChem CID: 526687  
C15H22

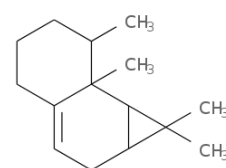

**C00017471**  
**Aristolene**  
PubChem CID: 530421  
C15H24

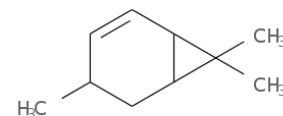

**(+)-4-Carene**  
PubChem CID: 530422  
C10H16

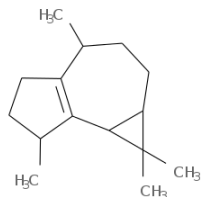

**C00037332**  
**Isodenedene**  
PubChem CID: 530426  
C15H24

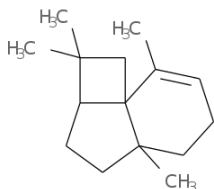

**alpha-Panasinsene**  
PubChem CID: 578929  
C15H24

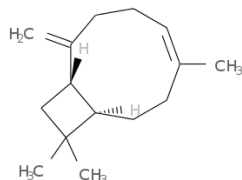

**C00003110**  
**beta-Caryophyllene**  
PubChem CID: 5281515  
C15H24

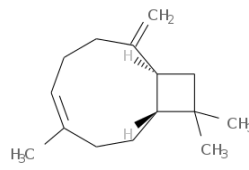

**C00012474**  
**Isocaryophyllene**  
PubChem CID: 5281522  
C15H24

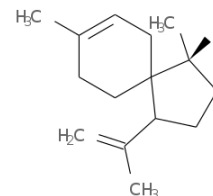

**C00021580**  
**beta-Acoradiene**  
PubChem CID: 5316209  
C15H24

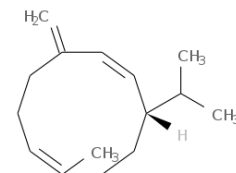

**(-)-Germacrene D**  
PubChem CID: 5317570  
C15H24

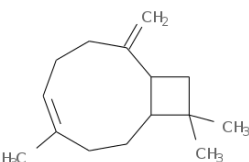

**C00003110**  
**Caryophyllene**  
PubChem CID: 5322111  
C15H24

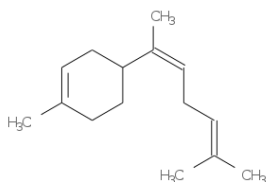

**alpha-Bisabolene**  
PubChem CID: 5352653  
C15H24

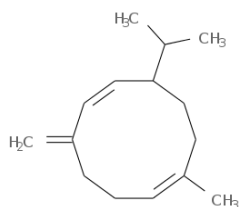

**C00011720**  
**Caryophyllene**  
PubChem CID: 5373727  
C15H24

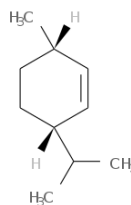

**2-Menthene**  
PubChem CID: 6427082  
C10H18

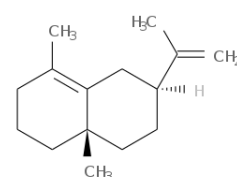

**4,11-Selinadiene**  
PubChem CID: 6429320  
C15H24

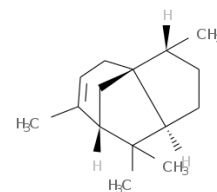

**C00003111**  
**alpha-Cedrene**  
PubChem CID: 6431015  
C15H24

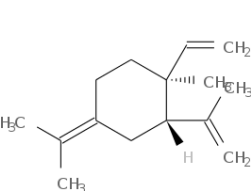

**C00012012**  
**gamma-Elementene**  
PubChem CID: 6432312  
C15H24

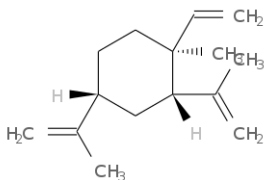

**C00007453**  
**beta-Elementene**  
PubChem CID: 6918391  
C15H24

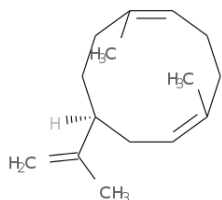

**C00011719**  
**Germacrene A**  
PubChem CID: 9548706  
C15H24

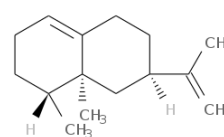

**C00034741**  
**Valencene**  
PubChem CID: 9855795  
C15H24

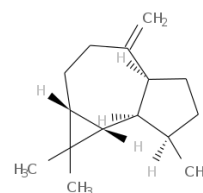

**C00021229**  
**Alloaromadendrene**  
PubChem CID: 10899740  
C15H24

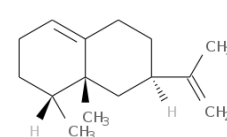

**C00016975**  
**Eremophilene**  
PubChem CID: 11160025  
C15H24



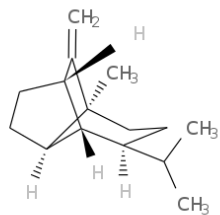

**(+)-Sativene**  
PubChem CID: 11275742  
C<sub>15</sub>H<sub>24</sub>

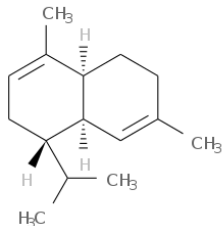

**C00029671**  
**alpha-Murolene**  
PubChem CID: 12306047  
C<sub>15</sub>H<sub>24</sub>

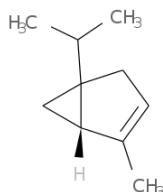

**C00000184**  
**alpha-Thujene**  
PubChem CID: 12444322  
C<sub>10</sub>H<sub>16</sub>

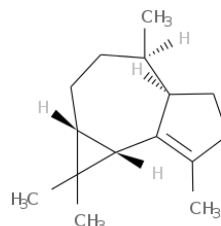

**C00021227**  
**alpha-Gurjunene**  
PubChem CID: 15560276  
C<sub>15</sub>H<sub>24</sub>

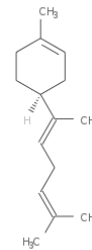

**C00050259**  
**Trans-alpha-bisabolene**  
PubChem CID: 24798703  
C<sub>15</sub>H<sub>24</sub>

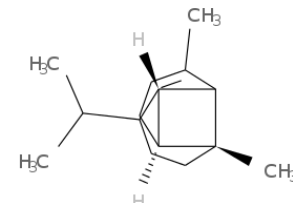

**C00003118**  
**alpha-Copaene**  
PubChem CID: 25245021  
C<sub>15</sub>H<sub>24</sub>

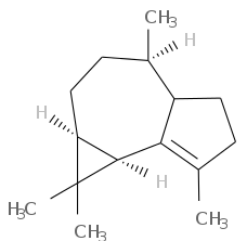

**Gurjunene**  
PubChem CID: 57369711  
C<sub>15</sub>H<sub>24</sub>

## Cluster 2 (33 VOCs)

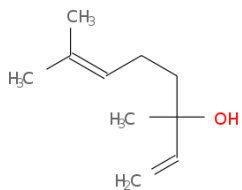

**beta-Linalool**  
PubChem CID: 6549  
C<sub>10</sub>H<sub>18</sub>O

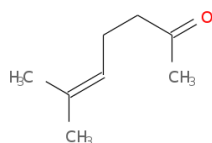

**C00034775**  
**6-Methyl-5-hepten-2-one**  
PubChem CID: 9862  
C<sub>8</sub>H<sub>14</sub>O

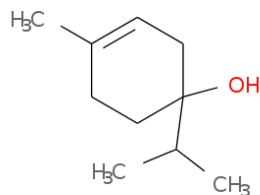

**C00029544**  
**Terpinen-4-ol**  
PubChem CID: 11230  
C<sub>10</sub>H<sub>18</sub>O

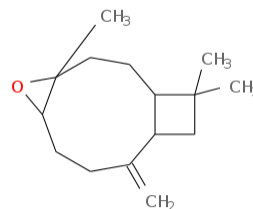

**C00012483**  
**Caryophyllene oxide**  
PubChem CID: 14350  
C<sub>15</sub>H<sub>24</sub>O

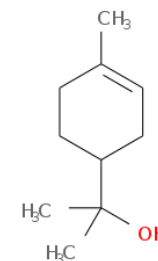

**p-Menth-1-en-8-ol**  
PubChem CID: 17100  
C<sub>15</sub>H<sub>24</sub>O

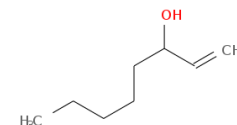

**C00029423**  
**1-Octen-3-ol**  
PubChem CID: 18827  
C<sub>8</sub>H<sub>16</sub>O

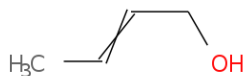

**2-Buten-1-ol**  
PubChem CID: 20024  
C<sub>4</sub>H<sub>8</sub>O

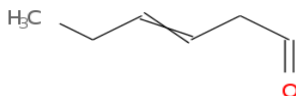

**C00048948**  
**3-Hexenal**  
PubChem CID: 23234  
C<sub>6</sub>H<sub>10</sub>O

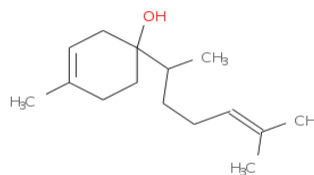

**beta-Bisobolol**  
PubChem CID: 27208  
C<sub>15</sub>H<sub>26</sub>O

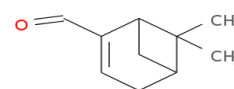

**C00030803**  
**Myrtenal**  
PubChem CID: 61130  
C<sub>10</sub>H<sub>14</sub>O

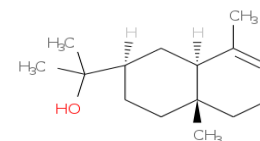

**C00000163**  
**alpha-Eudesmol**  
PubChem CID: 92762  
C<sub>15</sub>H<sub>26</sub>O

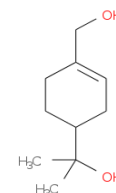

**p-Menth-1-en-8-ol**  
PubChem CID: 110662  
C<sub>10</sub>H<sub>18</sub>O<sub>2</sub>

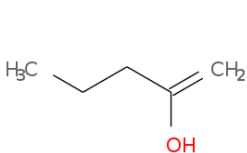

1-Penten-2-ol  
PubChem CID: 173840  
C<sub>5</sub>H<sub>10</sub>O

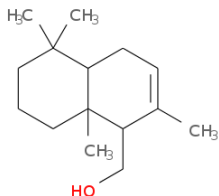

C00020282  
Drimenol  
PubChem CID: 298071  
C<sub>15</sub>H<sub>26</sub>O

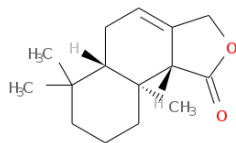

C00003252  
Drimenin  
PubChem CID: 442202  
C<sub>15</sub>H<sub>22</sub>O<sub>2</sub>

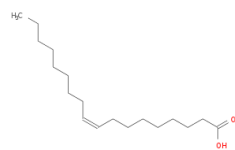

C00001232  
Oleic acid  
PubChem CID: 445639  
C<sub>18</sub>H<sub>34</sub>O<sub>2</sub>

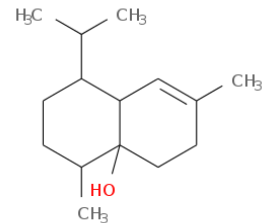

C00033734  
Cubenol  
PubChem CID: 519857  
C<sub>15</sub>H<sub>26</sub>O

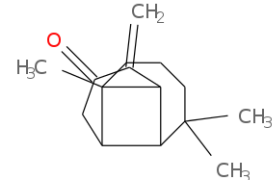

Longipinocarvone  
PubChem CID: 535296  
C<sub>15</sub>H<sub>22</sub>O

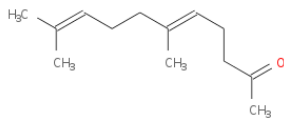

Geranylacetone  
PubChem CID: 1549778  
C<sub>13</sub>H<sub>22</sub>O

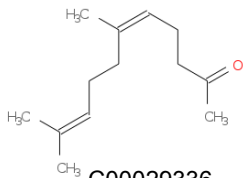

C00029336  
(E)-Geranyl acetone  
PubChem CID: 1713001  
C<sub>13</sub>H<sub>22</sub>O

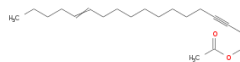

Z-3-Octadecen-1-ol acetate  
PubChem CID: 3085631  
C<sub>20</sub>H<sub>34</sub>O<sub>2</sub>

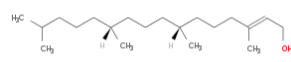

C00003467  
Phytol  
PubChem CID: 5280435  
C<sub>20</sub>H<sub>40</sub>O

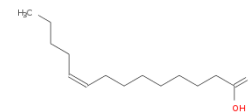

C00001229  
Myristoleic acid  
PubChem CID: 5281119  
C<sub>14</sub>H<sub>26</sub>O<sub>2</sub>

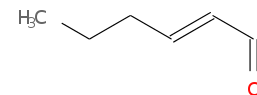

(E)-2-Hexenal  
PubChem CID: 5281168  
C<sub>6</sub>H<sub>10</sub>O

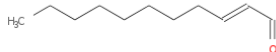

2-Undecenal  
PubChem CID: 5283356  
C<sub>11</sub>H<sub>20</sub>O

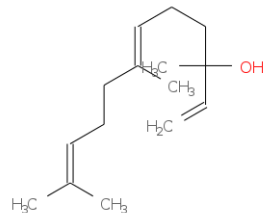

C00003166  
Nerolidol  
PubChem CID: 5284507  
C<sub>15</sub>H<sub>26</sub>O

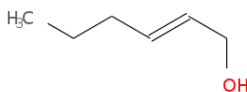

2-Hexenol  
PubChem CID: 5318042  
C<sub>6</sub>H<sub>12</sub>O

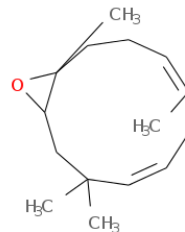

C00012443  
Humulene epoxide  
PubChem CID: 5352470  
C<sub>15</sub>H<sub>24</sub>O

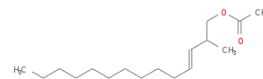

E-2-Methyl-3-tetradecen-1-ol acetate  
PubChem CID: 5363512  
C<sub>17</sub>H<sub>32</sub>O<sub>2</sub>

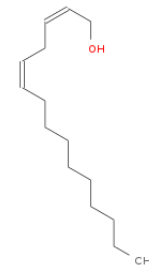

Z,Z-2,5-Pentadecadien-1-ol  
PubChem CID: 5364952  
C<sub>8</sub>H<sub>16</sub>O

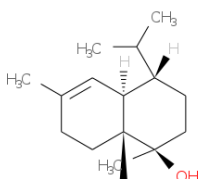

C00020065  
alpha-Cadinol  
PubChem CID: 10398656  
C<sub>15</sub>H<sub>26</sub>O

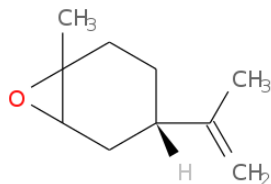

C00035852  
Limonene oxide  
PubChem CID: 10953718  
C<sub>10</sub>H<sub>16</sub>O

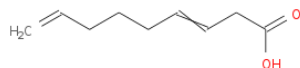

(2E,6E)-2,6-Nonadienoic acid  
PubChem CID: 54098240  
C<sub>9</sub>H<sub>14</sub>O<sub>2</sub>

**Cluster 3 (41 VOCs)**

|                                                                                                                                                       |                                                                                                                                                        |                                                                                                                                                   |                                                                                                                                                          |                                                                                                                                                           |                                                                                                                                                        |
|-------------------------------------------------------------------------------------------------------------------------------------------------------|--------------------------------------------------------------------------------------------------------------------------------------------------------|---------------------------------------------------------------------------------------------------------------------------------------------------|----------------------------------------------------------------------------------------------------------------------------------------------------------|-----------------------------------------------------------------------------------------------------------------------------------------------------------|--------------------------------------------------------------------------------------------------------------------------------------------------------|
|  <p>C00035857<br/>Octane<br/>PubChem CID: 356<br/>C8H18</p>           |  <p>Isobutane<br/>PubChem CID: 6360<br/>C4H10</p>                     |  <p>2-Methyl-butane<br/>PubChem CID: 6556<br/>C5H12</p>          |  <p>2-Methylpentane<br/>PubChem CID: 7892<br/>C6H14</p>                |  <p>C00035853<br/>Methylcyclohexane<br/>PubChem CID: 7962<br/>C7H14</p> |  <p>Pentane<br/>PubChem CID: 8003<br/>C5H12</p>                     |
|  <p>Hexane<br/>PubChem CID: 8058<br/>C6H14</p>                        |  <p>C00007453<br/>Cyclohexane<br/>PubChem CID: 8078<br/>C6H12</p>     |  <p>C00034882<br/>Nonane<br/>PubChem CID: 8141<br/>C9H20</p>     |  <p>C00001248<br/>Dodecane<br/>PubChem CID: 8182<br/>C12H26</p>        |  <p>C00030165<br/>Eicosane<br/>PubChem CID: 8222<br/>C20H42</p>        |  <p>Heptane<br/>PubChem CID: 8900<br/>C7H16</p>                     |
|  <p>2,3,3-Trimethylpentane<br/>PubChem CID: 11215<br/>C8H18</p>       |  <p>C00050708<br/>3-Methylhexane<br/>PubChem CID: 11507<br/>C7H16</p> |  <p>1,4-Dimethylcyclohexane<br/>PubChem CID: 11523<br/>C8H16</p> |  <p>C00035484<br/>2-Methylhexane<br/>PubChem CID: 11582<br/>C7H16</p>  |  <p>C00030879<br/>Octadecane<br/>PubChem CID: 11635<br/>C18H38</p>     |  <p>C00001265<br/>Pentadecane<br/>PubChem CID: 12391<br/>C15H32</p> |
|  <p>C00030472<br/>Heptadecane<br/>PubChem CID: 12398<br/>C17H36</p> |  <p>C00030827<br/>Nonadecane<br/>PubChem CID: 12401<br/>C19H40</p>  |  <p>Phytane<br/>PubChem CID: 12523<br/>C20H42</p>              |  <p>C00032307<br/>Tetracosane<br/>PubChem CID: 12592<br/>C24H50</p> |  <p>2,4-Dimethylheptane<br/>PubChem CID: 13534<br/>C9H20</p>         |  <p>3-Methylundecane<br/>PubChem CID: 13845<br/>C12H26</p>        |

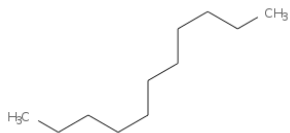

**C00032443**  
Undecane  
PubChem CID: 14257  
C<sub>11</sub>H<sub>24</sub>

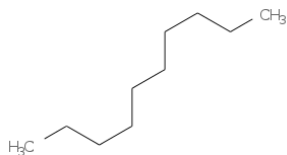

**C00048375**  
Decane  
PubChem CID: 15600  
C<sub>10</sub>H<sub>22</sub>

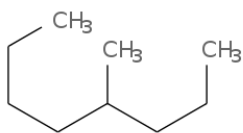

**4-Methyloctane**  
PubChem CID: 16665  
C<sub>9</sub>H<sub>20</sub>

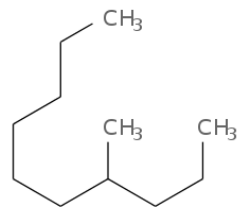

**4-Methyl decane**  
PubChem CID: 17835  
C<sub>11</sub>H<sub>24</sub>

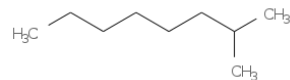

**2-Methyloctane**  
PubChem CID: 18591  
C<sub>9</sub>H<sub>20</sub>

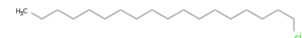

**1-Chlorooctadecane**  
PubChem CID: 18815  
C<sub>18</sub>H<sub>37</sub>Cl

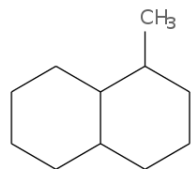

**Trans-anti-1-methyl-decahydronaphthalene**  
PubChem CID: 34193  
C<sub>11</sub>H<sub>20</sub>

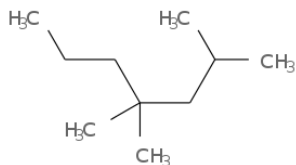

**2,2,4-Trimethylheptane**  
PubChem CID: 77653  
C<sub>10</sub>H<sub>22</sub>

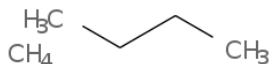

**Alkanes**  
PubChem CID: 94630  
C<sub>5</sub>H<sub>14</sub>

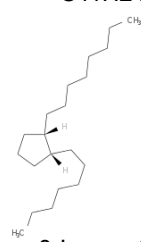

**8-Isoprostane**  
PubChem CID: 107873  
C<sub>20</sub>H<sub>40</sub>

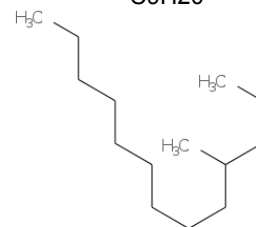

**4-Methyltridecane**  
PubChem CID: 117325  
C<sub>14</sub>H<sub>30</sub>

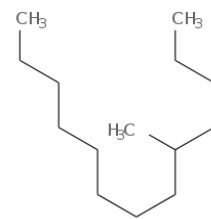

**5-Methyltridecane**  
PubChem CID: 520182  
C<sub>14</sub>H<sub>30</sub>

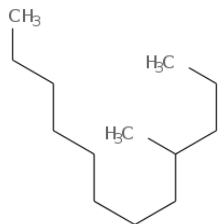

**4-Methyldodecane**  
PubChem CID: 521958  
C<sub>13</sub>H<sub>28</sub>

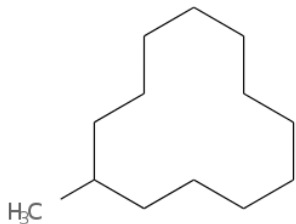

**Methylcyclododecane**  
PubChem CID: 524446  
C<sub>13</sub>H<sub>26</sub>

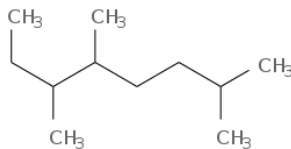

**2,5,6-Trimethyloctane**  
PubChem CID: 545571  
C<sub>11</sub>H<sub>24</sub>

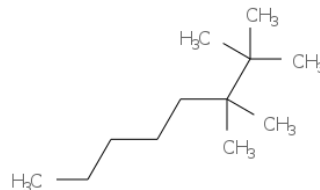

**Pentamethylheptane**  
PubChem CID: 3033849  
C<sub>12</sub>H<sub>26</sub>

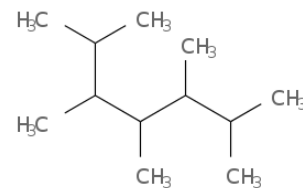

**2,3,4,5,6-Pentamethylheptane**  
PubChem CID: 10910000  
C<sub>12</sub>H<sub>26</sub>

Cluster 4 (18 VOCs)

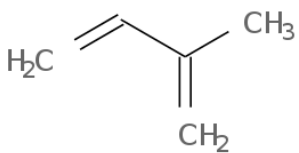

C00046784  
Isoprene  
PubChem CID: 6557  
C5H8

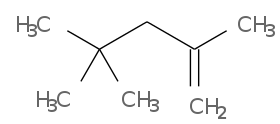

2,4,4-Trimethyl-1-pentene  
PubChem CID: 7868  
C8H16

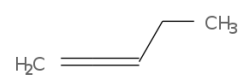

1,2-Pentadiene  
PubChem CID: 11588  
C5H8

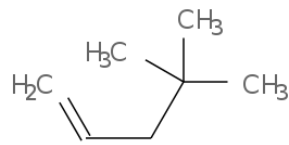

4,4-Dimethyl-1-pentene  
PubChem CID: 12984  
C7H14

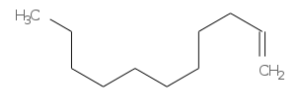

1-Undecene  
PubChem CID: 13190  
C11H22

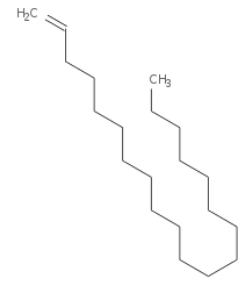

1-Eicosene  
PubChem CID: 18936  
C20H40

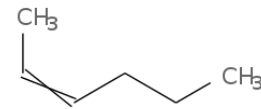

2-Hexene  
PubChem CID: 19966  
C6H12

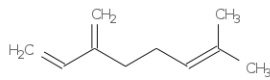

C00000853  
Myrcene  
PubChem CID: 31253  
C10H16

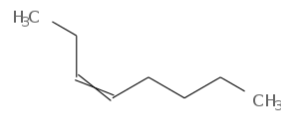

3-Octene  
PubChem CID: 32935  
C8H16

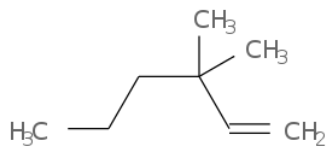

3,3-Dimethylhex-1-ene  
PubChem CID: 137924  
C8H16

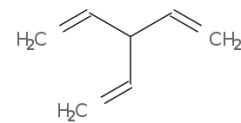

1,4-Pentadiene  
PubChem CID: 141289  
C7H10

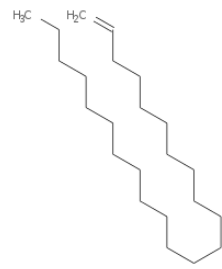

Tricosene  
PubChem CID: 181154  
C23H46

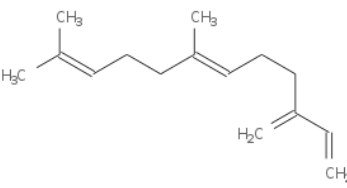

C00003131  
beta-Farnesene  
PubChem CID: 5281517  
C15H24

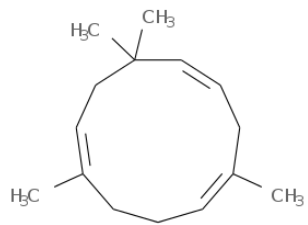

C00003147  
alpha-Caryophyllene  
PubChem CID: 5281520  
C15H24

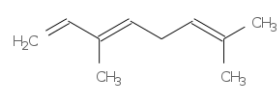

Ocimene  
PubChem CID: 5281553  
C10H16

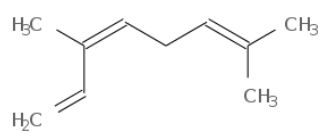

C00029335  
beta-Ocimene  
PubChem CID: 5320250  
C10H16

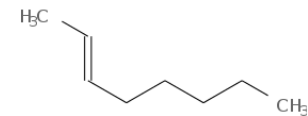

2-Octene  
PubChem CID: 5364448  
C8H16

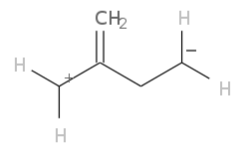

2-Methylbut-1-ene  
PubChem CID: 53627566  
C5H8

Cluster 5 (21 VOCs)

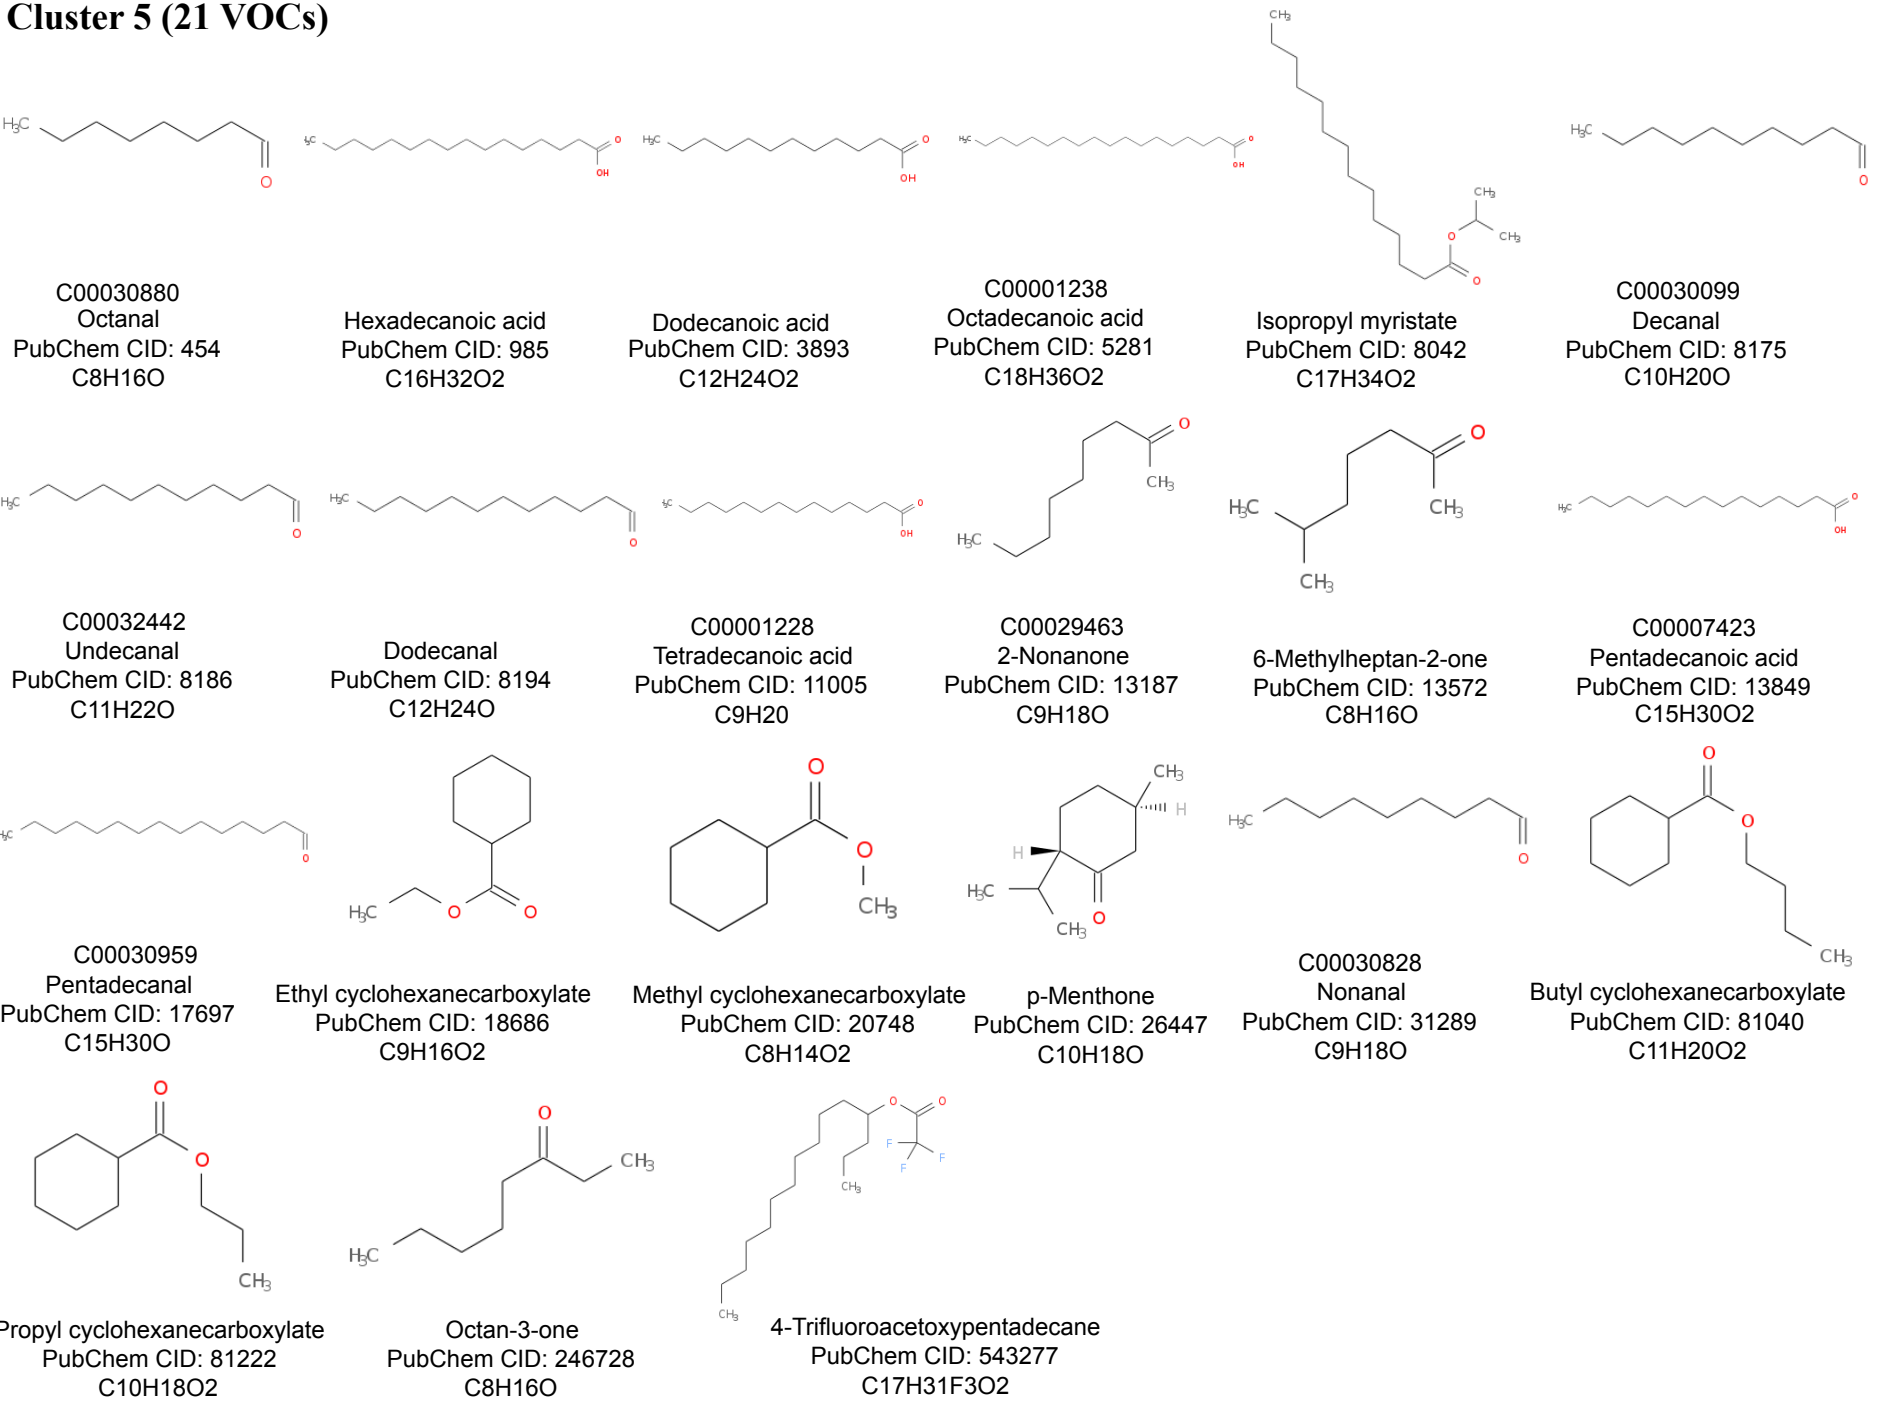

**Cluster 6 (25 VOCs)**

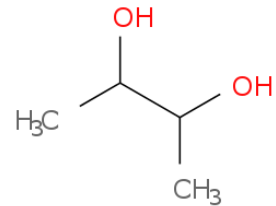

C00050411  
2,3-Butanediol  
PubChem CID: 262  
C4H10O2

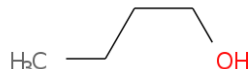

1-Butanol  
PubChem CID: 263  
C4H10O

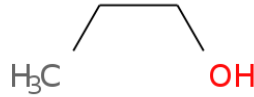

Propanol  
PubChem CID: 1031  
C3H8O

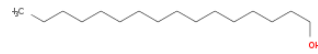

1-Hexadecanol  
PubChem CID: 2682  
C16H34O

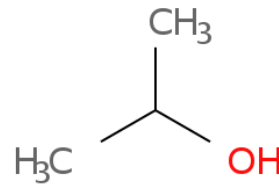

2-Propanol  
PubChem CID: 3776  
C3H8O

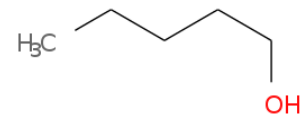

Pentanol  
PubChem CID: 6276  
C5H12O

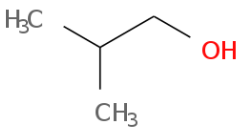

2-Methyl-1-propanol  
PubChem CID: 6560  
C4H10O

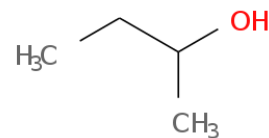

2-Butanol  
PubChem CID: 6568  
C4H10O

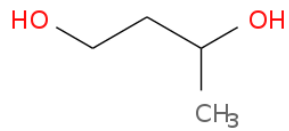

1, 3-butanediol  
PubChem CID: 7896  
C4H10O2

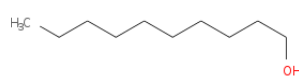

C00030100  
Decanol  
PubChem CID: 8174  
C10H22O

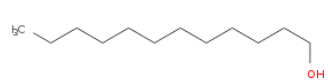

C00030152  
1-Dodecanol  
PubChem CID: 8193  
C12H26O

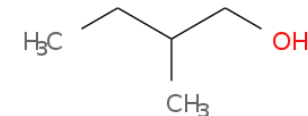

C00050415  
2-Methyl-1-butanol  
PubChem CID: 8723  
C5H12O

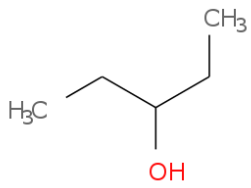

3-Pentanol  
PubChem CID: 11428  
C5H12O

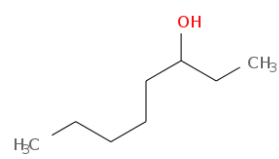

C00035495  
3-Octanol  
PubChem CID: 11527  
C8H18O

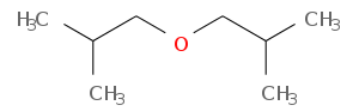

Isobutylether  
PubChem CID: 12346  
C8H18O

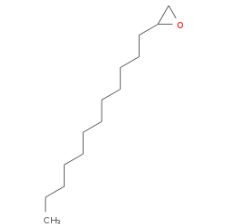

2-Dodecyloxirane  
PubChem CID: 18604  
C14H28O

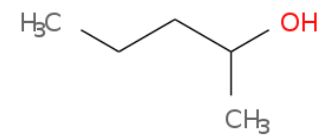

2-Pentanol  
PubChem CID: 22386  
C5H12O

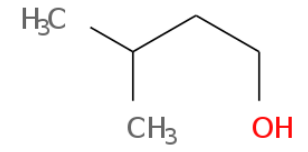

3-Methyl-1-butanol  
PubChem CID: 31260  
C5H12O

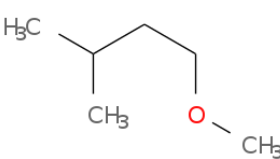

Butane-1-methoxy-3-methyl  
PubChem CID: 136445  
C6H14O

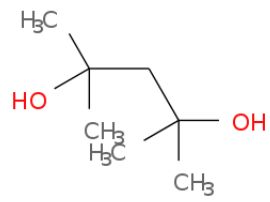

2,4-Dimethylpentane  
PubChem CID: 141153  
C7H16O2

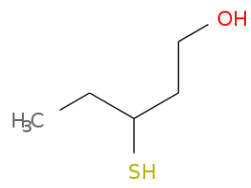

3-Sulfanyl-pentan-1-ol  
PubChem CID: 480012  
C5H12OS

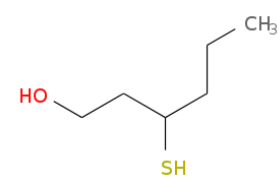

3-Sulfanylhexas-1-ol  
PubChem CID: 521348  
C6H14OS

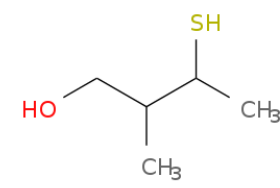

2-Methyl-3-sulfanylbutan-1-ol  
PubChem CID: 6430892  
C5H12OS

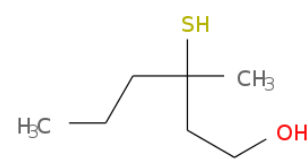

3-Methyl-3-sulfanylhexas-1-ol  
PubChem CID: 10130039  
C7H16OS

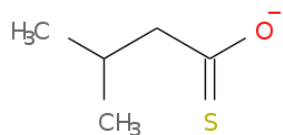

S-Methyl 3-methylbutanethioate  
PubChem CID: 21274855  
C5H9OS-

## Cluster 7 (47 VOCs)

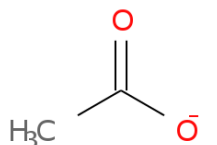

Acetate  
PubChem CID: 175  
C2H3O2-

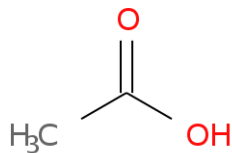

Acetic acid  
PubChem CID: 176  
C2H4O2

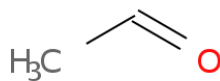

C00007392  
Acetaldehyde  
PubChem CID: 177  
C2H4O

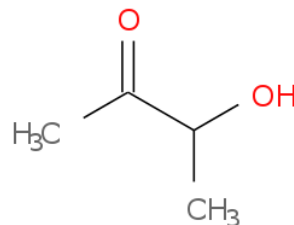

C00050424  
Acetoin  
PubChem CID: 179  
C4H8O2

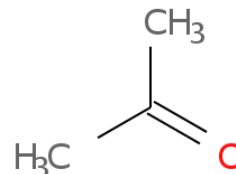

C00048304  
Acetone  
PubChem CID: 180  
C3H6O

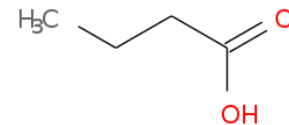

Butanoic acid  
PubChem CID: 264  
C4H8O2

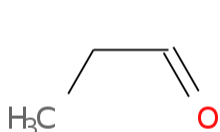

C00050492  
Propanal  
PubChem CID: 527  
C3H6O

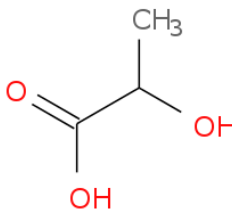

Propanoic acid  
PubChem CID: 612  
C3H6O3

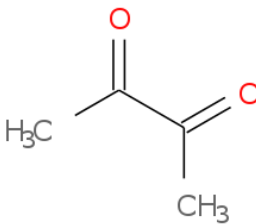

C00050437  
2,3-Butanedione  
PubChem CID: 650  
C4H6O2

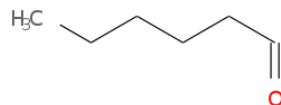

C00000357  
Hexanal  
PubChem CID: 6184  
C6H12O

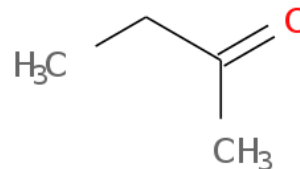

2-Butanone  
PubChem CID: 6569  
C4H8O

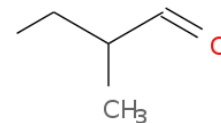

2-Methyl-butanal  
PubChem CID: 7284  
C5H10O

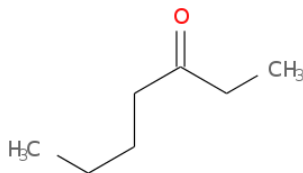

3-Heptanone  
PubChem CID: 7802  
C7H14O

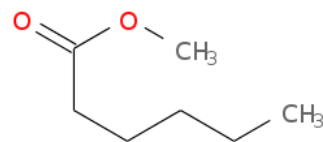

Methyl hexanoate  
PubChem CID: 7824  
C7H14O2

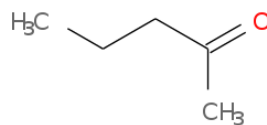

2-Pentanone  
PubChem CID: 7895  
C5H10O

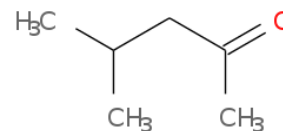

C00051562  
Methyl isobutyl ketone  
PubChem CID: 7909  
C6H12O

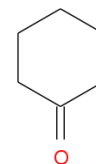

Cyclohexanone  
PubChem CID: 7967  
C6H10O

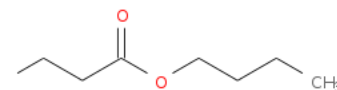

1-Chloro-3-methylbutane  
PubChem CID: 7983  
C8H16O2



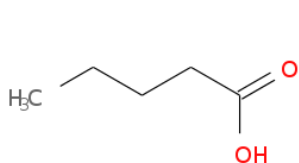

Pentanoic acid  
PubChem CID: 7991  
C<sub>5</sub>H<sub>10</sub>O<sub>2</sub>

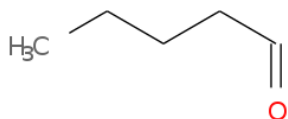

Pentanal  
PubChem CID: 8063  
C<sub>5</sub>H<sub>10</sub>O

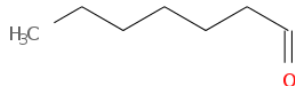

Heptanal  
PubChem CID: 8130  
C<sub>7</sub>H<sub>14</sub>O

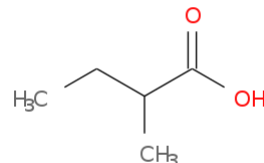

C00029461  
2-Methylbutanoic acid  
PubChem CID: 8314  
C<sub>5</sub>H<sub>10</sub>O<sub>2</sub>

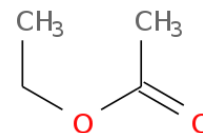

C00001308  
Ethyl acetate  
PubChem CID: 8857  
C<sub>4</sub>H<sub>8</sub>O<sub>2</sub>

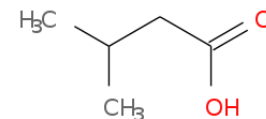

C00001189  
3-Methylbutanoic acid  
PubChem CID: 10430  
C<sub>5</sub>H<sub>10</sub>O<sub>2</sub>

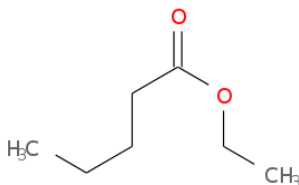

Ethyl valerate  
PubChem CID: 10882  
C<sub>7</sub>H<sub>14</sub>O<sub>2</sub>

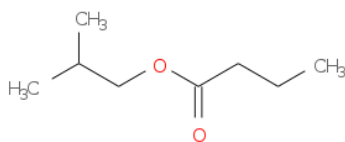

2-Methylpropyl butanoate  
PubChem CID: 10885  
C<sub>8</sub>H<sub>16</sub>O<sub>2</sub>

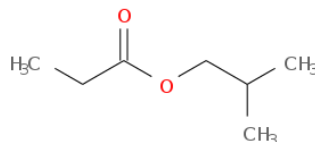

2-Methylpropyl propanoate  
PubChem CID: 10895  
C<sub>7</sub>H<sub>14</sub>O<sub>2</sub>

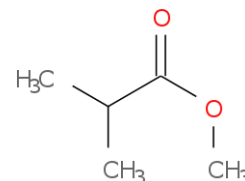

Methyl 2-methylpropanoate  
PubChem CID: 11039  
C<sub>5</sub>H<sub>10</sub>O<sub>2</sub>

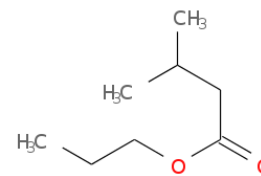

Propyl 3-methylbutanoate  
PubChem CID: 11176  
C<sub>8</sub>H<sub>16</sub>O<sub>2</sub>

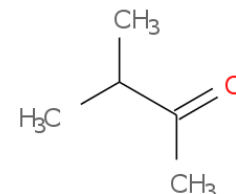

3-Methyl-butan-2-one  
PubChem CID: 11251  
C<sub>5</sub>H<sub>10</sub>O

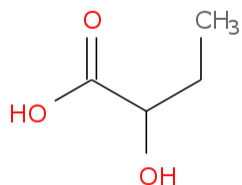

alpha-Hydroxybutyric acid  
PubChem CID: 11266  
C<sub>4</sub>H<sub>8</sub>O<sub>3</sub>

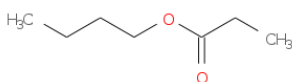

Butyl propanoate  
PubChem CID: 11529  
C<sub>7</sub>H<sub>14</sub>O<sub>2</sub>

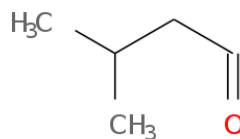

C00048949  
3-Methyl-butanal  
PubChem CID: 11552  
C<sub>5</sub>H<sub>10</sub>O

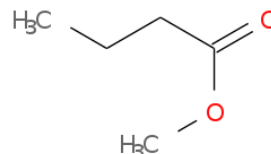

Methyl butanoate  
PubChem CID: 12180  
C<sub>5</sub>H<sub>10</sub>O<sub>2</sub>

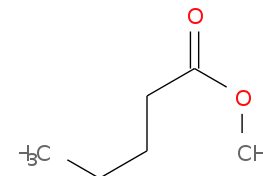

Methyl pentanoate  
PubChem CID: 12206  
C<sub>6</sub>H<sub>12</sub>O<sub>2</sub>

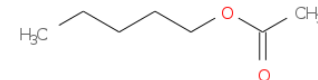

Pentyl acetate  
PubChem CID: 12348  
C<sub>7</sub>H<sub>14</sub>O<sub>2</sub>

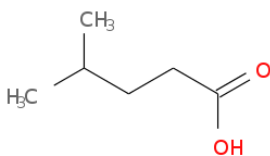

4-Methylpentanoic acid  
PubChem CID: 12587  
C<sub>6</sub>H<sub>12</sub>O<sub>2</sub>

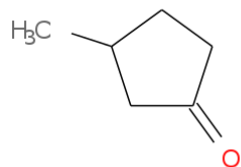

3-Methyl-cyclopentanone  
PubChem CID: 15650  
C<sub>6</sub>H<sub>10</sub>O

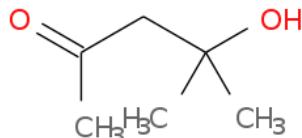

4-Hydroxy-4-methyl-2-pentanone  
PubChem CID: 31256  
C<sub>6</sub>H<sub>12</sub>O<sub>2</sub>

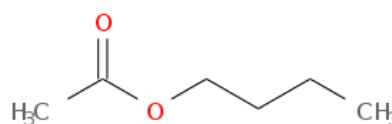

C00048958  
Butyl acetate  
PubChem CID: 31272  
C<sub>6</sub>H<sub>12</sub>O<sub>2</sub>

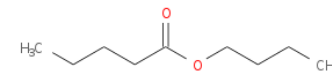

Butyl pentanoate  
PubChem CID: 61137  
C<sub>9</sub>H<sub>18</sub>O<sub>2</sub>

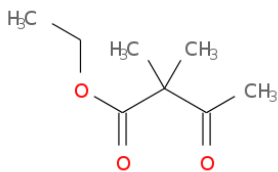

Ethyl 2,2-dimethyl-3-oxobutanoate  
PubChem CID: 69002  
C<sub>8</sub>H<sub>14</sub>O<sub>3</sub>

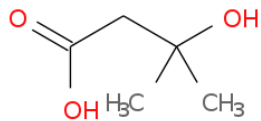

3-Hydroxyisovaleric acid  
PubChem CID: 69362  
C<sub>5</sub>H<sub>10</sub>O<sub>3</sub>

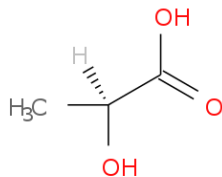

C00050478  
Lactic acid  
PubChem CID: 107689  
C<sub>3</sub>H<sub>6</sub>O<sub>3</sub>

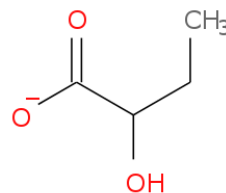

2-Hydroxybutyrate  
PubChem CID: 4071895  
C<sub>4</sub>H<sub>7</sub>O<sub>3</sub><sup>-</sup>

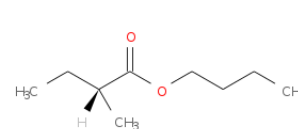

Butyl (2R)-2-methylbutanoate  
PubChem CID: 6997354  
C<sub>9</sub>H<sub>18</sub>O<sub>2</sub>

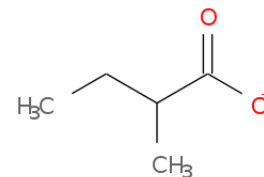

2-Methylbutanoate  
PubChem CID: 22253297  
C<sub>5</sub>H<sub>9</sub>O<sub>2</sub><sup>-</sup>

## Cluster 8 (15 VOCs)

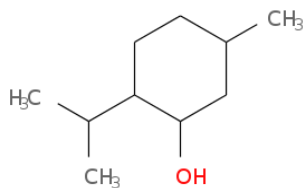

5-Methyl-2-(1-methylethyl)-cyclohexanol  
PubChem CID: 1254  
C<sub>10</sub>H<sub>20</sub>O

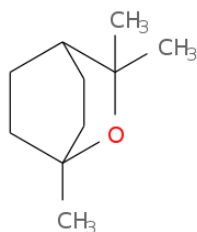

C00000136  
1,8-Cineole  
PubChem CID: 2758  
C<sub>10</sub>H<sub>18</sub>O

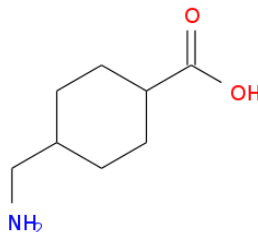

Cyclohexanecarboxylic acid  
PubChem CID: 5526  
C<sub>8</sub>H<sub>15</sub>NO<sub>2</sub>

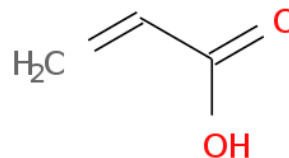

C00034423  
2-Propenoic acid  
PubChem CID: 6581  
C<sub>3</sub>H<sub>4</sub>O<sub>2</sub>

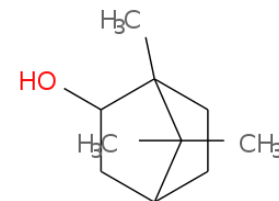

C00003028  
Borneol  
PubChem CID: 64685  
C<sub>10</sub>H<sub>18</sub>O<sub>2</sub>

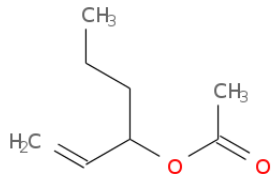

3-Hexenyl acetate  
PubChem CID: 118262  
C<sub>3</sub>H<sub>6</sub>O

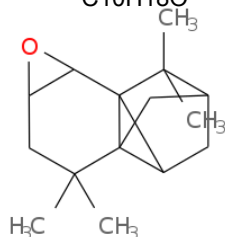

Cyclolongifolene oxide  
PubChem CID: 560863  
C<sub>15</sub>H<sub>22</sub>O

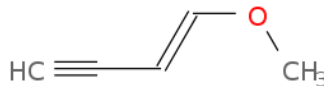

C00030482  
Hexyl tiglate  
PubChem CID: 637523  
C<sub>11</sub>H<sub>20</sub>O<sub>2</sub>

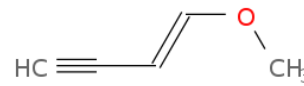

1-Methoxy-1-buten-3-yne  
PubChem CID: 643188  
C<sub>5</sub>H<sub>6</sub>O

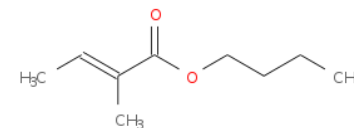

Butyl tiglate  
PubChem CID: 5352450  
C<sub>9</sub>H<sub>16</sub>O<sub>2</sub>

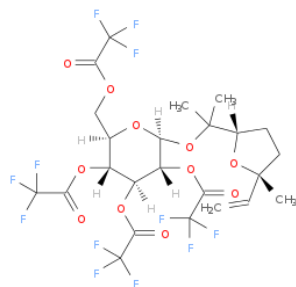

Linalool oxide (furanoid)  
PubChem CID: 6428167  
C<sub>24</sub>H<sub>24</sub>F<sub>12</sub>O<sub>11</sub>

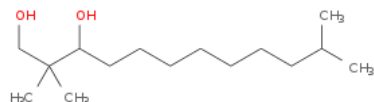

C00011411  
2,6,10-Trimethyldodecane  
PubChem CID: 44145032  
C<sub>15</sub>H<sub>32</sub>O<sub>2</sub>

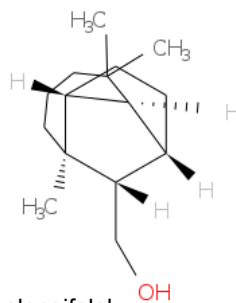

Isolongifolol  
PubChem CID: 12311096  
C<sub>15</sub>H<sub>26</sub>O

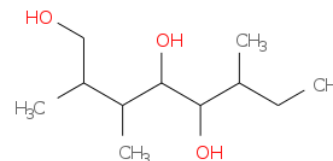

2,3,6-Trimethyloctane  
PubChem CID: 58940158  
C<sub>11</sub>H<sub>24</sub>O<sub>3</sub>

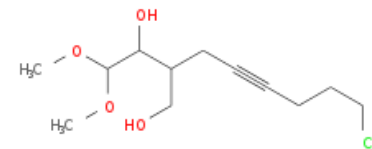

1,4-Dimethoxy-2,3-butanediol  
PubChem CID: 71403024  
C<sub>12</sub>H<sub>29</sub>ClO<sub>8</sub>

# Cluster 9 (42 VOCs)

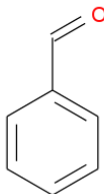

C00034452  
Benzaldehyde  
PubChem CID: 240  
C7H6O

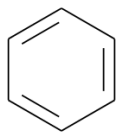

Benzene  
PubChem CID: 241  
C6H6

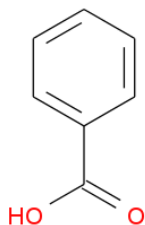

C00000207  
Benzoic acid  
PubChem CID: 243  
C7H6O2

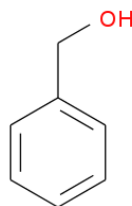

C00029811  
Benzyl alcohol  
PubChem CID: 244  
C7H8O

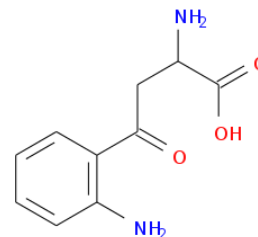

C00051181  
Kynurenine  
PubChem CID: 846  
C10H12N2O3

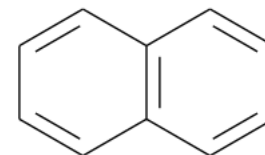

C00001259  
Naphthalene  
PubChem CID: 931  
C10H8

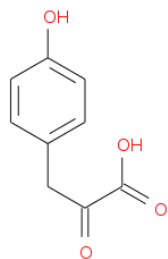

C00007512  
p-Hydroxyphenylpyruvic acid  
PubChem CID: 979  
C9H8O4

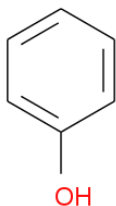

C00002664  
Phenol  
PubChem CID: 996  
C6H6O

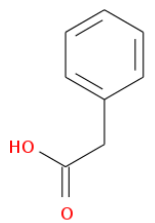

C00000750  
Phenylacetic acid  
PubChem CID: 999  
C8H8O2

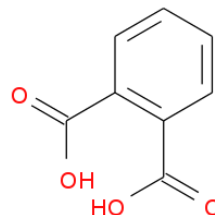

Phthalic acid  
PubChem CID: 1017  
C8H6O4

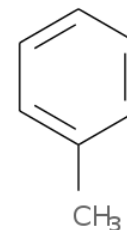

Toluene  
PubChem CID: 1140  
C7H8

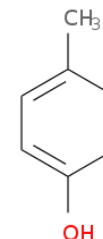

C00002645  
4-Methylphenol  
PubChem CID: 2879  
C7H8O

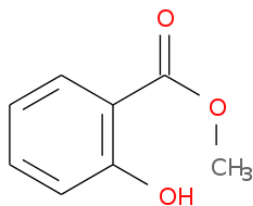

C00030767  
Methyl salicylate  
PubChem CID: 4133  
C8H8O3

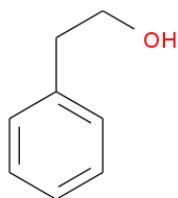

C00002663  
2-Phenylethanol  
PubChem CID: 6054  
C8H10O

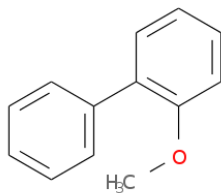

o-Phenylanisole  
PubChem CID: 6835  
C13H12O

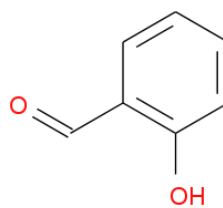

C00031273  
Salicylaldehyde  
PubChem CID: 6998  
C7H6O2

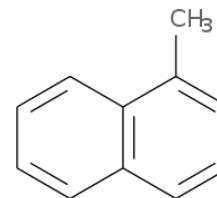

C00050647  
1-Methylnaphthalene  
PubChem CID: 7002  
C11H10

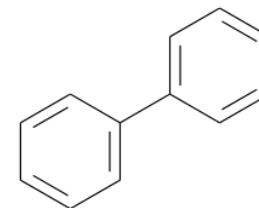

Biphenyl  
PubChem CID: 7095  
C12H10

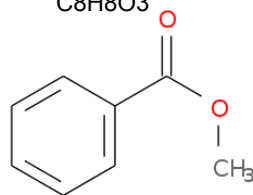

C00034054  
Methyl benzoate  
PubChem CID: 7150  
C8H8O2

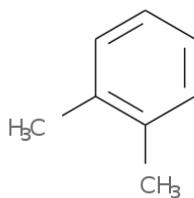

C00035778  
1,3-Dimethylbenzene  
PubChem CID: 7237  
C8H10

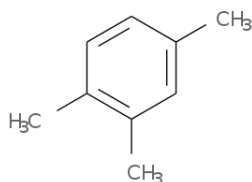

Trimethylbenzene  
PubChem CID: 7247  
C9H12

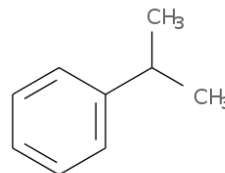

3-(1-methylethyl)-benzene  
PubChem CID: 7406  
C9H12

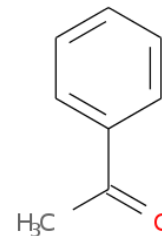

1-Phenyl-ethanone  
PubChem CID: 7410  
C8H8O

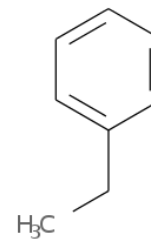

Ethylbenzene  
PubChem CID: 7500  
C8H10

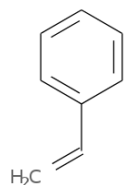

C00037855  
Styrene  
PubChem CID: 7501  
C<sub>8</sub>H<sub>8</sub>

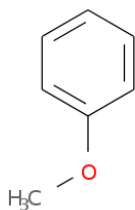

Anisole  
PubChem CID: 7519  
C<sub>7</sub>H<sub>8</sub>O

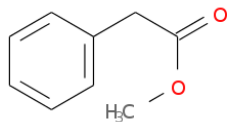

C00051576  
Methyl phenylacetate  
PubChem CID: 7559  
C<sub>9</sub>H<sub>10</sub>O<sub>2</sub>

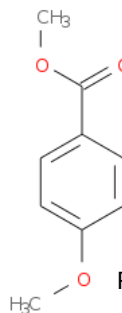

C00030761  
Methyl p-anisate  
PubChem CID: 8499  
C<sub>9</sub>H<sub>10</sub>O<sub>3</sub>

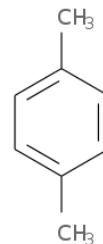

1,4-Xylene  
PubChem CID: 7809  
C<sub>8</sub>H<sub>10</sub>

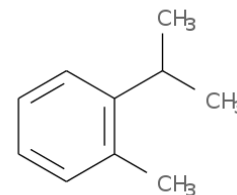

1-Methyl-2-(1-methylethyl)-benzene  
PubChem CID: 10703  
C<sub>10</sub>H<sub>14</sub>

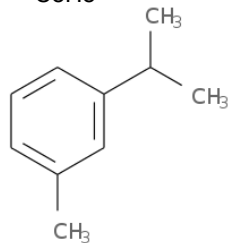

beta-Cymene  
PubChem CID: 10812  
C<sub>10</sub>H<sub>14</sub>

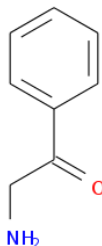

2-Aminoacetophenone  
PubChem CID: 11952  
C<sub>8</sub>H<sub>9</sub>NO

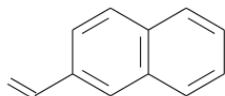

2-Ethenylnaphtalene  
PubChem CID: 13230  
C<sub>12</sub>H<sub>10</sub>

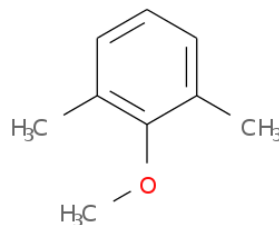

2-Methoxy-1,3-dimethylbenzene  
PubChem CID: 66088  
C<sub>15</sub>H<sub>24</sub>

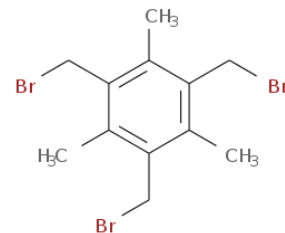

1,2,4-Trimethylbenzene  
PubChem CID: 89140  
C<sub>12</sub>H<sub>15</sub>Br<sub>3</sub>

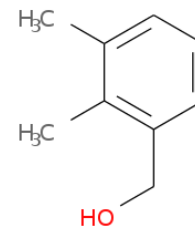

Benzenemethanol  
PubChem CID: 96208  
C<sub>9</sub>H<sub>10</sub>O

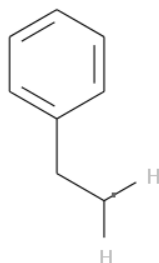

2-Phenylethyl alcohol  
PubChem CID: 146323  
C<sub>8</sub>H<sub>9</sub>

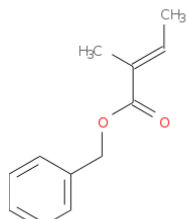

C00048327  
Benzyl tiglate  
PubChem CID: 250096  
C<sub>12</sub>H<sub>14</sub>O<sub>2</sub>

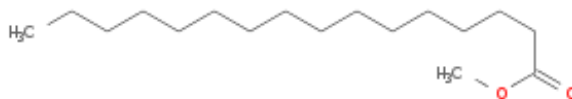

C00030755  
Methyl hexadecanoate  
PubChem CID: 470382  
C<sub>17</sub>H<sub>34</sub>FNO<sub>4</sub>

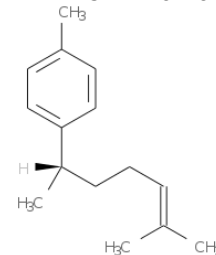

C00046607  
alpha-Curcumenol  
PubChem CID: 3083834  
C<sub>15</sub>H<sub>22</sub>

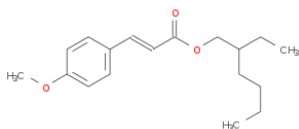

2-Ethylhexyl-4-methoxy-cinnamate  
PubChem CID: 5355130  
C<sub>18</sub>H<sub>26</sub>O<sub>3</sub>

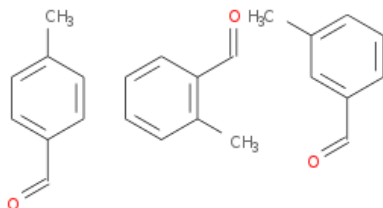

Tolualdehyde  
PubChem CID: 24832083  
C<sub>8</sub>H<sub>8</sub>O

Cluster 10 (14 VOCs)

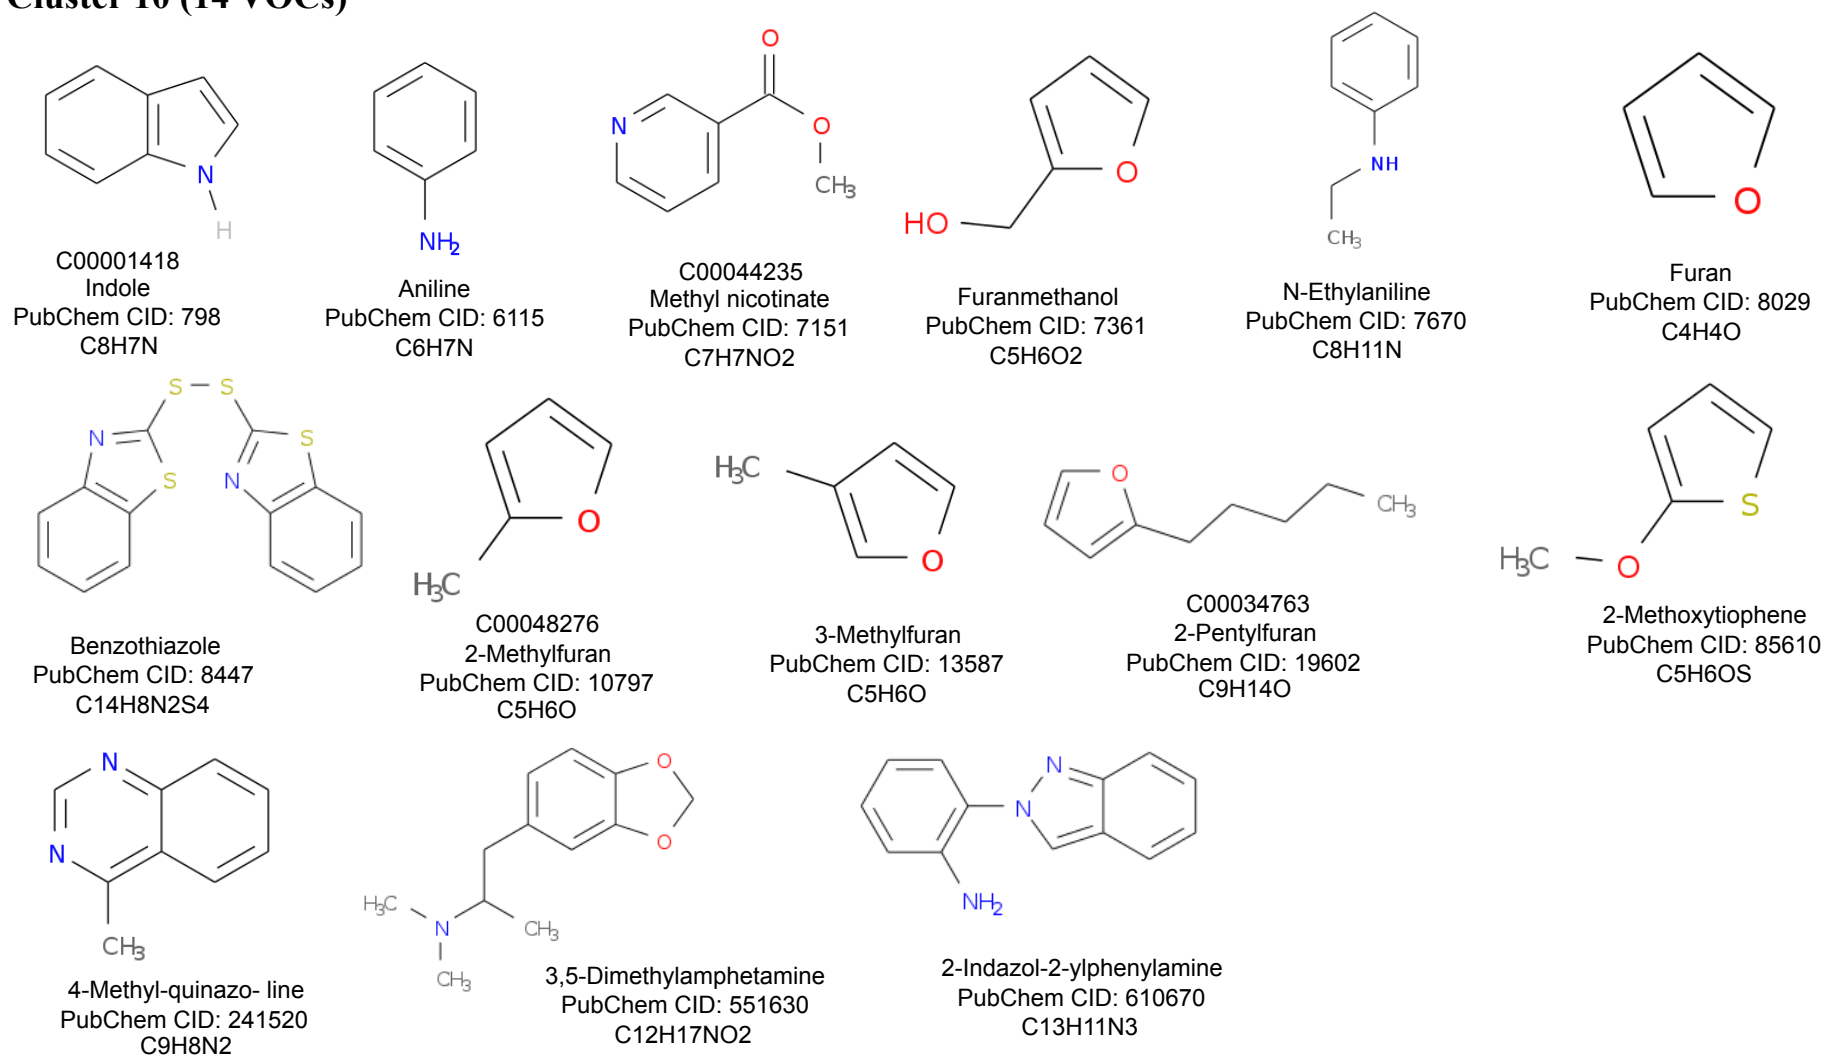

Cluster 11 (30 VOCs)

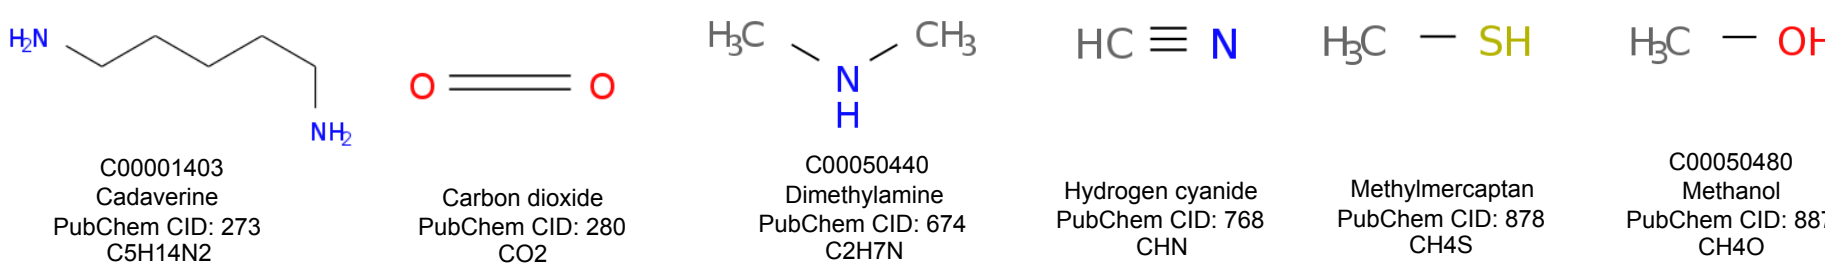

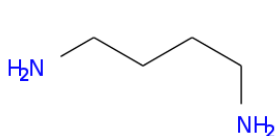

C00001428  
Putrescine  
PubChem CID: 1045  
C<sub>4</sub>H<sub>12</sub>N<sub>2</sub>

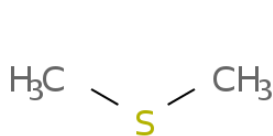

Benzene  
PubChem CID: 1068  
Dimethyl sulfide  
C<sub>2</sub>H<sub>6</sub>S

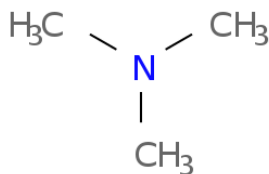

C00001433  
Trimethylamine  
PubChem CID: 1146  
C<sub>3</sub>H<sub>9</sub>N

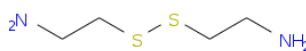

Cystamine  
PubChem CID: 2915  
C<sub>4</sub>H<sub>12</sub>N<sub>2</sub>S<sub>2</sub>

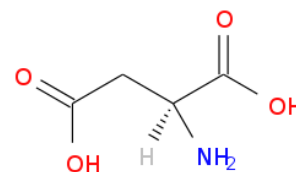

Aspartic acid  
PubChem CID: 5960  
C<sub>4</sub>H<sub>7</sub>NO<sub>4</sub>

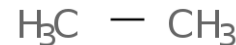

Ethane  
PubChem CID: 6324  
C<sub>2</sub>H<sub>6</sub>

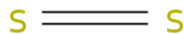

Carbon disulfide  
PubChem CID: 6348  
CS<sub>2</sub>

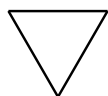

Cyclopropane  
PubChem CID: 6351  
C<sub>3</sub>H<sub>6</sub>

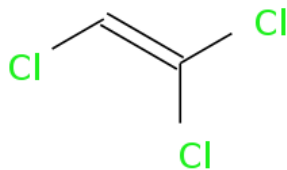

Trichloroethylene  
PubChem CID: 6575  
C<sub>2</sub>HCl<sub>3</sub>

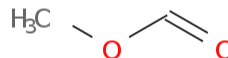

Methyl formate  
PubChem CID: 7865  
C<sub>2</sub>H<sub>4</sub>O<sub>2</sub>

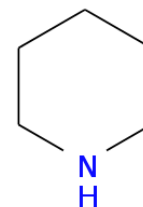

Piperidine  
PubChem CID: 8082  
C<sub>7</sub>H<sub>8</sub>

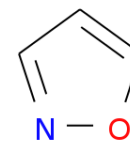

Isoxazole  
PubChem CID: 9254  
C<sub>3</sub>H<sub>3</sub>NO

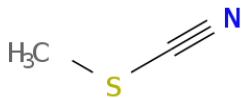

Methyl thiocyanide  
PubChem CID: 11168  
C<sub>2</sub>H<sub>3</sub>NS

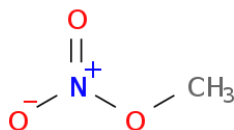

Methyl nitrate  
PubChem CID: 11724  
CH<sub>3</sub>NO<sub>3</sub>

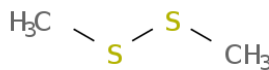

C00001245  
Dimethyl disulfide  
PubChem CID: 12232  
C<sub>2</sub>H<sub>6</sub>S<sub>2</sub>

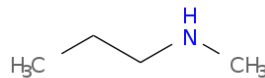

N-Methyl-2-methylpropylamine  
PubChem CID: 12315  
C<sub>4</sub>H<sub>11</sub>N

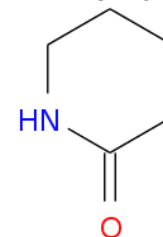

2-Piperidinone  
PubChem CID: 12665  
C<sub>5</sub>H<sub>9</sub>NO

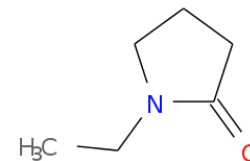

1-Ethyl-2-pyrrolidinone  
PubChem CID: 17595  
C<sub>6</sub>H<sub>11</sub>NO

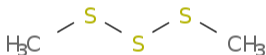

C00001246  
Dimethyl trisulfide  
PubChem CID: 19310  
C<sub>2</sub>H<sub>6</sub>S<sub>3</sub>

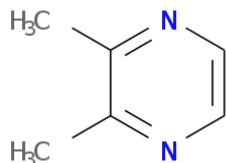

2,3-Dimethyl-pyrazine  
PubChem CID: 22201  
C<sub>6</sub>H<sub>8</sub>N<sub>2</sub>

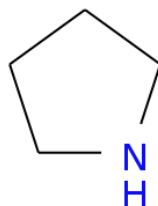

Pyrrolidine  
PubChem CID: 31268  
C<sub>4</sub>H<sub>9</sub>N

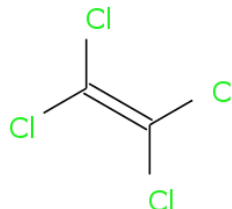

Tetrachloroethylene  
PubChem CID: 31373  
C<sub>2</sub>Cl<sub>4</sub>

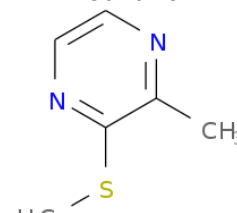

2-Methyl-pyrazine  
PubChem CID: 76152  
C<sub>6</sub>H<sub>8</sub>N<sub>2</sub>S

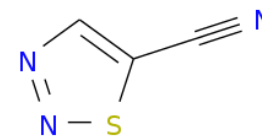

5-Cyano-1,2,3-thiadiazole  
PubChem CID: 558078  
C<sub>3</sub>H<sub>3</sub>N<sub>3</sub>S
